# Supplementary material for: Discovery of Novel Small-Molecule Inhibitors of PD-1/PD-L1 Interaction via Structural Simplification Strategy
Source: MDPI journal article supplement (doi:10.3390/molecules26113347), 2021-06-02
Supplement: s1 [file s1]

## **Supporting Information**

**Discovery of novel small-molecule inhibitors of PD-1/PD-L1 interaction via structural simplification strategy**

## Table of Contents

|                                                  |                                      |
|--------------------------------------------------|--------------------------------------|
| <b>I. Supplementary Tables.....</b>              | <b>S3</b>                            |
| Table S1 .....                                   | S3                                   |
| <b>II. Spectroscopic data.....</b>               | <b>S4</b>                            |
| <b>III. HPLC Spectroscopic data for A9 .....</b> | <b>SError! Bookmark not defined.</b> |

## I. Supplementary Table

**Table S1.** The Kinetic Parameters and Binding Affinities of compounds with hPD-L1.

| Compound | $K_a$ (M <sup>-1</sup> s <sup>-1</sup> ) | $K_d$ (s <sup>-1</sup> ) | $K_D$ (M)             | LE <sup>a</sup> |
|----------|------------------------------------------|--------------------------|-----------------------|-----------------|
| A7       | 7.89×10 <sup>5</sup>                     | 6.38×10 <sup>-3</sup>    | 8.09×10 <sup>-9</sup> | 0.35            |
| A9       | 5.38×10 <sup>5</sup>                     | 1.96×10 <sup>-3</sup>    | 3.64×10 <sup>-9</sup> | 0.40            |
| A11      | 5.76×10 <sup>5</sup>                     | 3.68×10 <sup>-3</sup>    | 6.39×10 <sup>-9</sup> | 0.39            |
| A15      | 5.05×10 <sup>5</sup>                     | 1.01×10 <sup>-2</sup>    | 1.99×10 <sup>-8</sup> | 0.36            |

<sup>a</sup> The result is calculated by the equation:  $LE = -1.35 \log K_D / N_{\text{heavy atoms}}$ ,  $N_{\text{heavy atoms}}$  is the number of non-H atoms.

## II. Spectroscopic data of compounds A1–18

### <sup>1</sup>H NMR Spectra for Compound A1

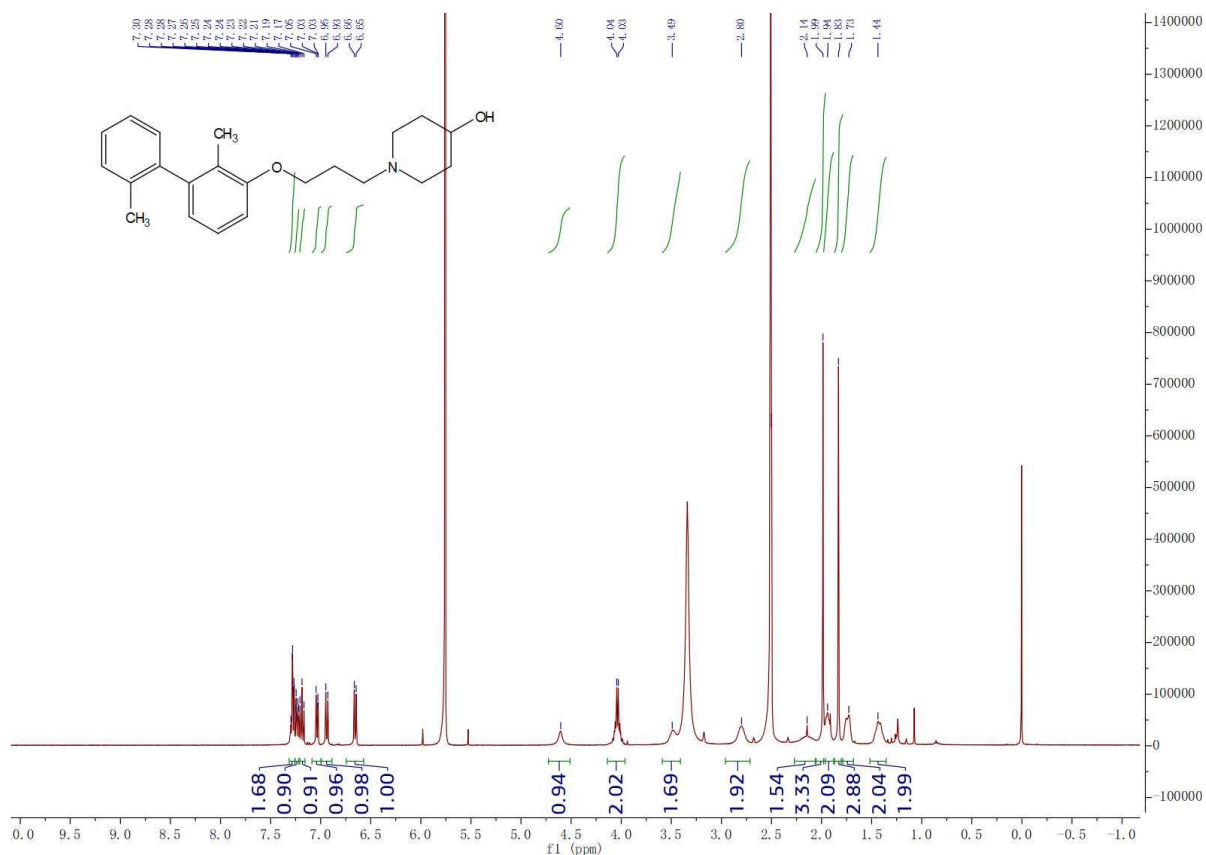

### LCMS Spectra for Compound A1

| Sample Name              | Position                       | Instrument Name | Instrument 1 | User Name              | G6520B-PC\Admin      |
|--------------------------|--------------------------------|-----------------|--------------|------------------------|----------------------|
| Inj Vol 0.1              | InjPosition                    | SampleType      | Sample       | IRM Calibration Status | Success              |
| Data Filename PL-4-2-p.d | ACQ Method 20110418-MSonly-p.m | Comment         |              | Acquired Time          | 6/8/2020 10:05:29 AM |

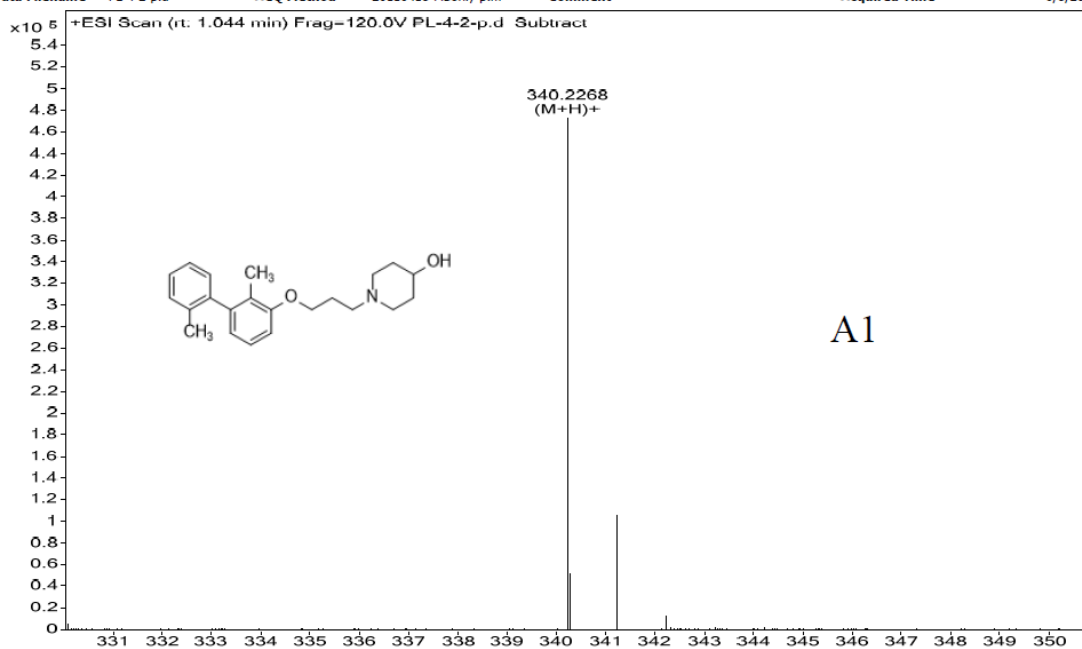

## <sup>13</sup>C NMR Spectra for Compound A1

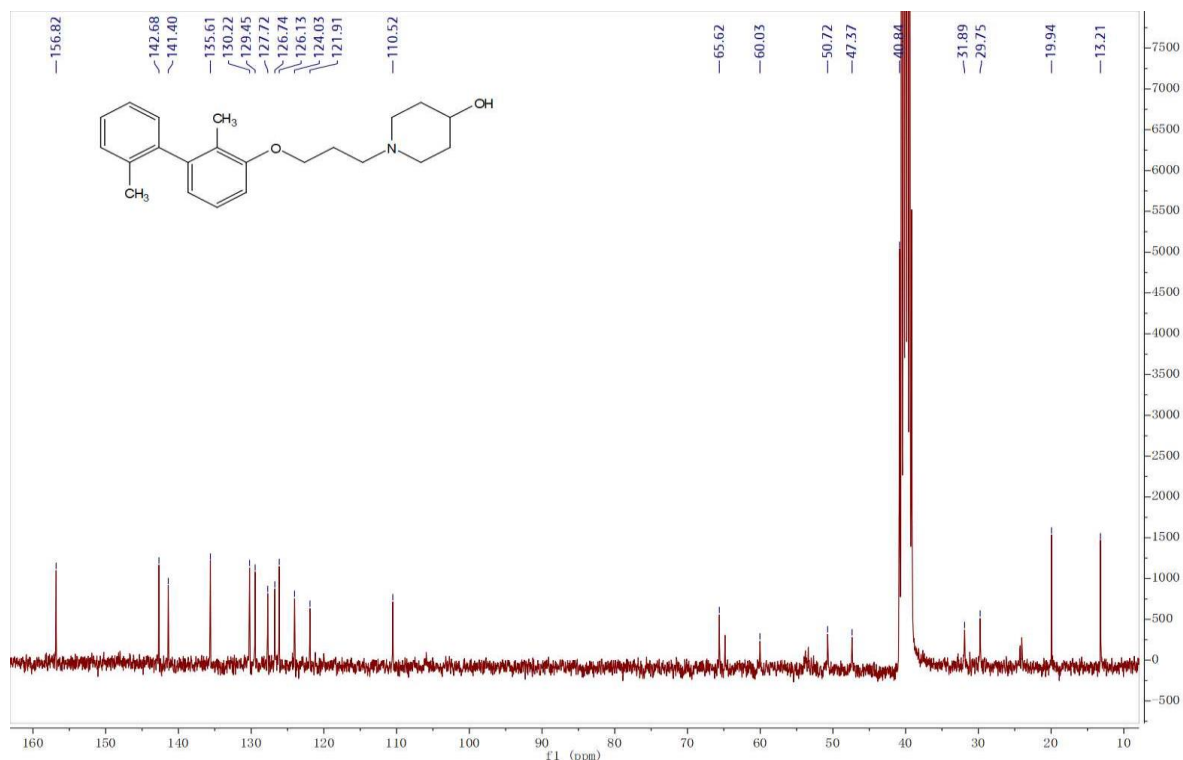

## <sup>1</sup>H NMR Spectra for Compound A2

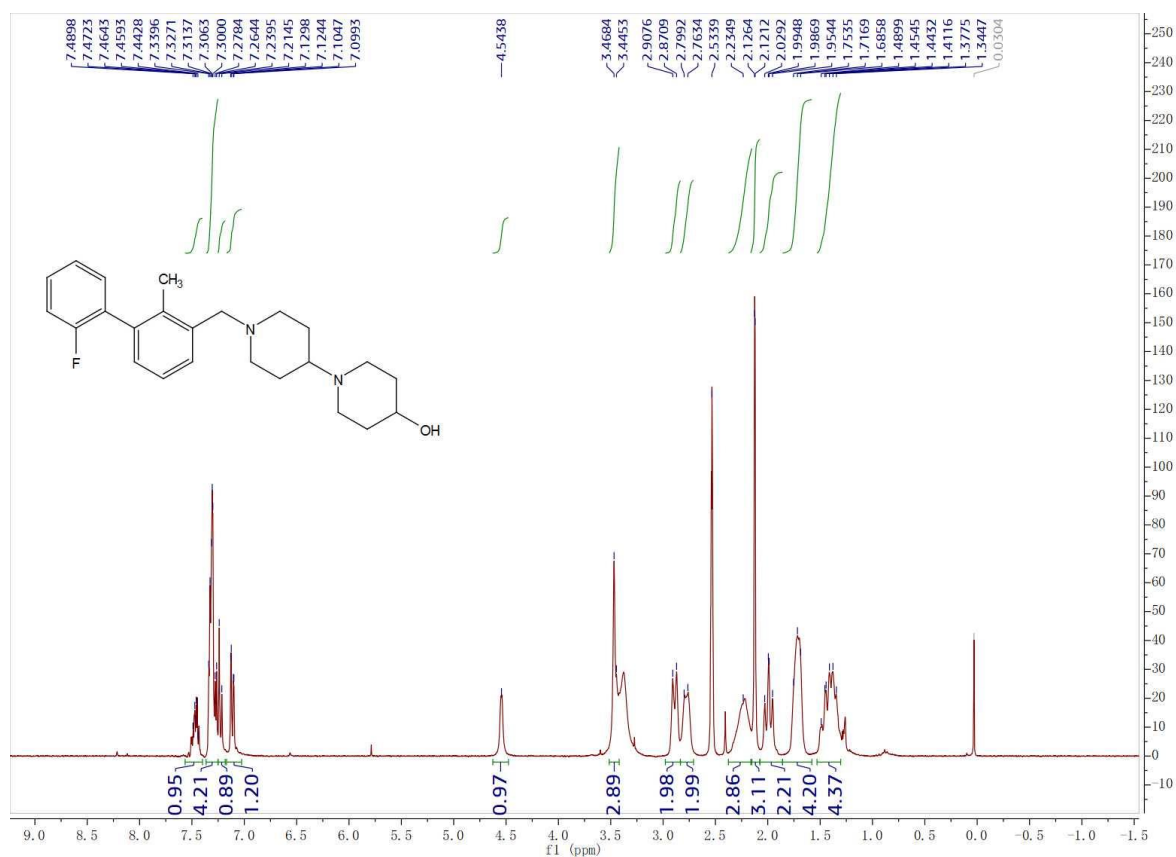

## LCMS Spectra for Compound A2

| Sample Name              | Position                      | Instrument Name | Instrument 1 | User Name              | G6520B-PC\Admin      |
|--------------------------|-------------------------------|-----------------|--------------|------------------------|----------------------|
| Inj Vol 0.1              | p2B9                          | SampleType      | Sample       | IRM Calibration Status | Success              |
| Data Filename PL-5-7-p.d | ACQ Method 20110418-MOnly-p.m | Comment         |              | Acquired Time          | 6/8/2020 10:51:40 AM |

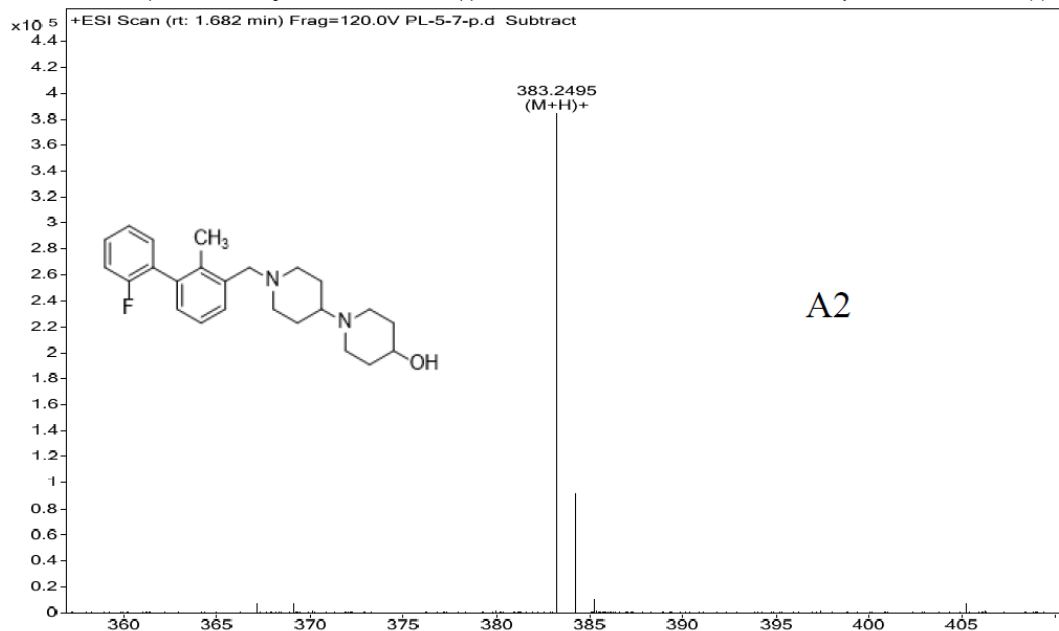

### <sup>13</sup>C NMR Spectra for Compound A2

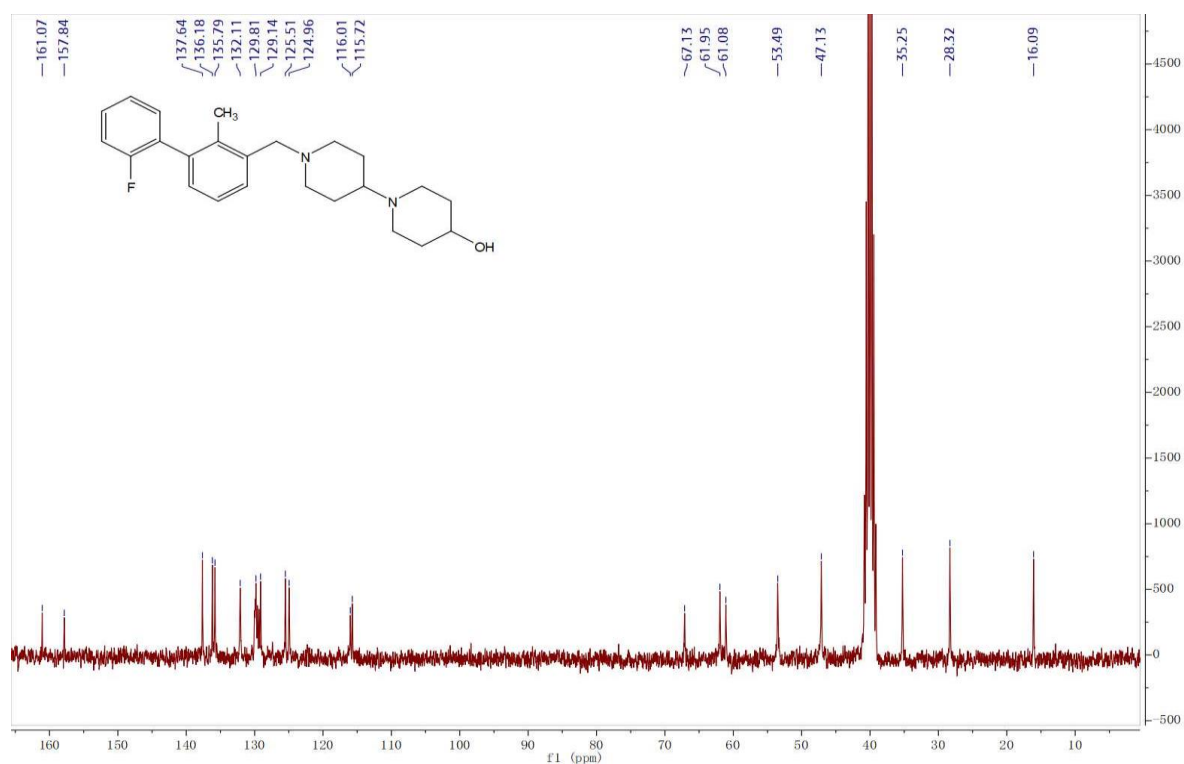

### <sup>1</sup>H NMR Spectra for Compound A3

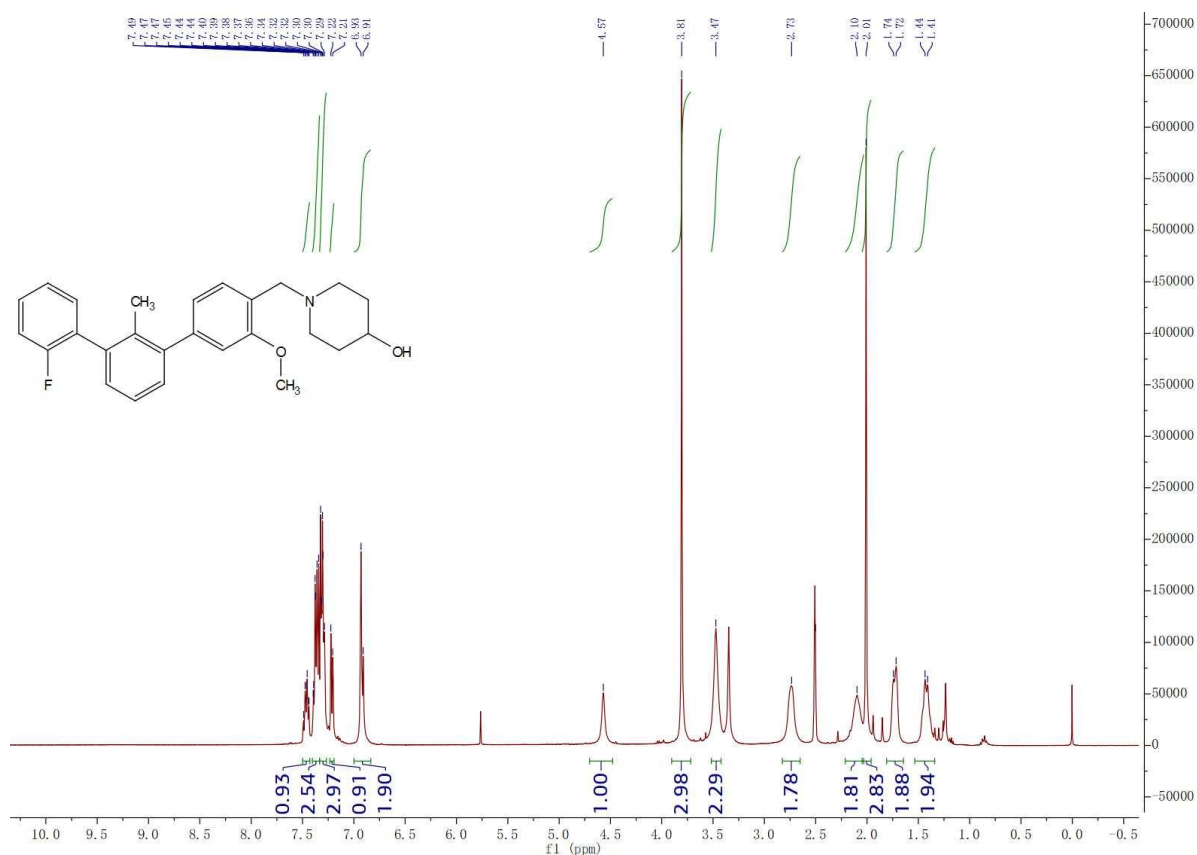

LCMS Spectra for Compound A3

| Sample Name   | Position    | Instrument Name | Instrument 1 | User Name              | G6520B-PC\Admin        |
|---------------|-------------|-----------------|--------------|------------------------|------------------------|
| Inj Vol       | 0.05        | InjPosition     | Sample       | IRM Calibration Status | Success                |
| Data Filename | PL-5-23-p.d | ACQ Method      | Comment      | Acquired Time          | 12/25/2020 10:52:43 AM |

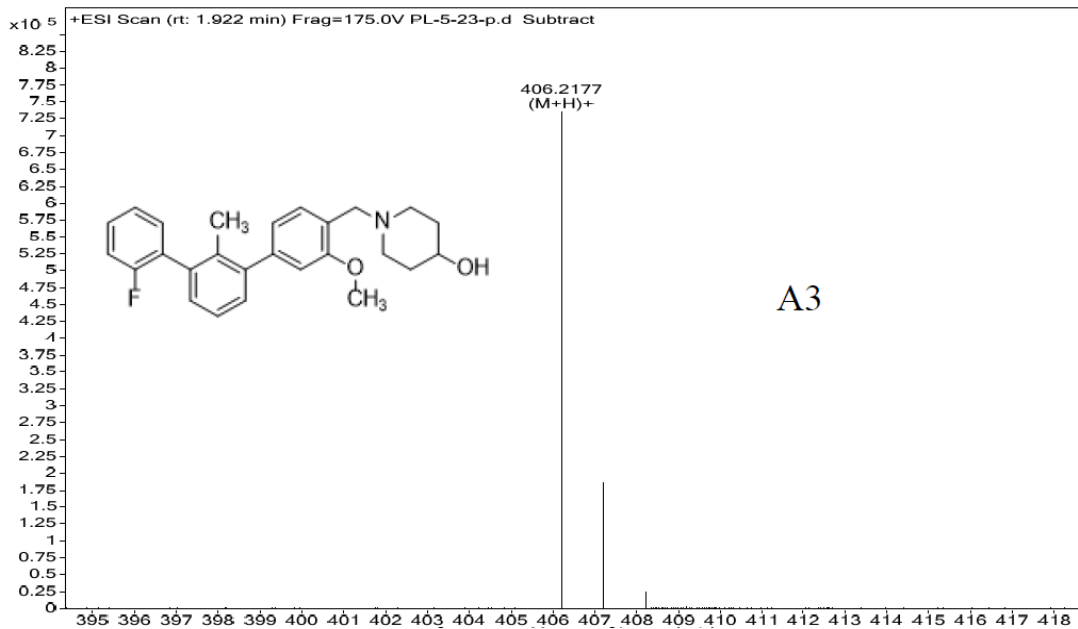

<sup>13</sup>C NMR Spectra for Compound A3

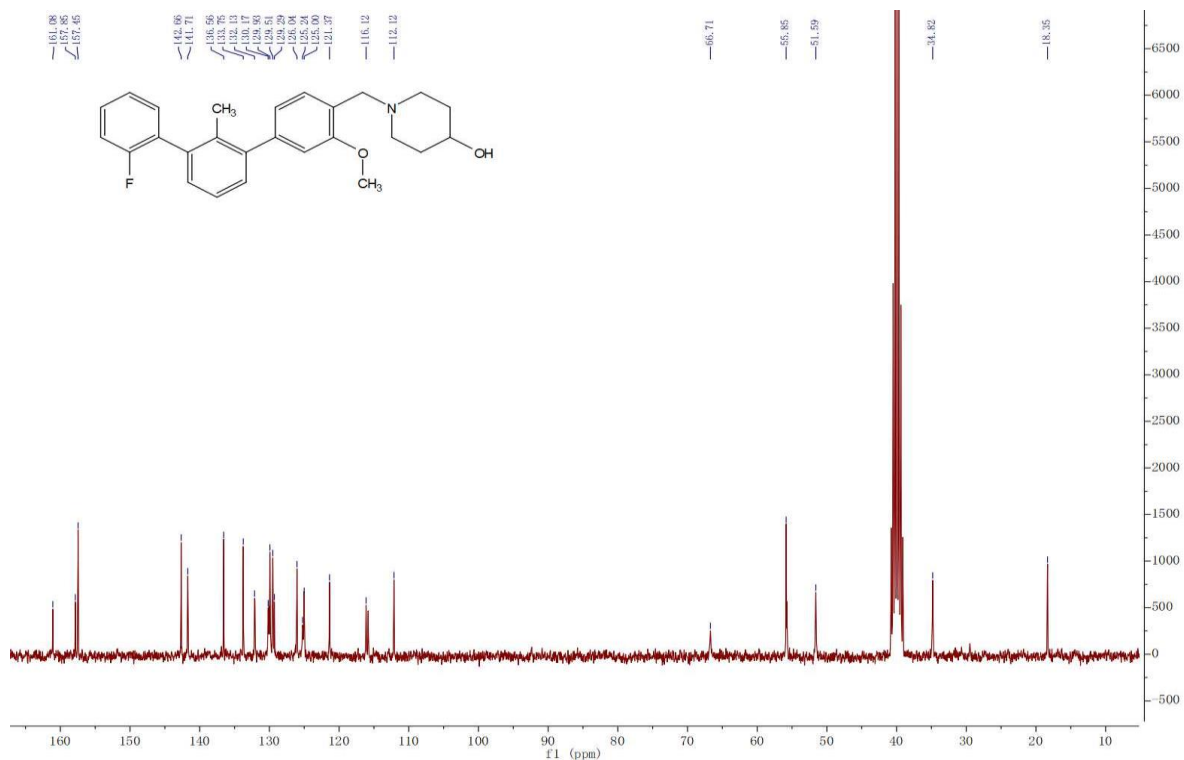

<sup>1</sup>H NMR Spectra for Compound A4

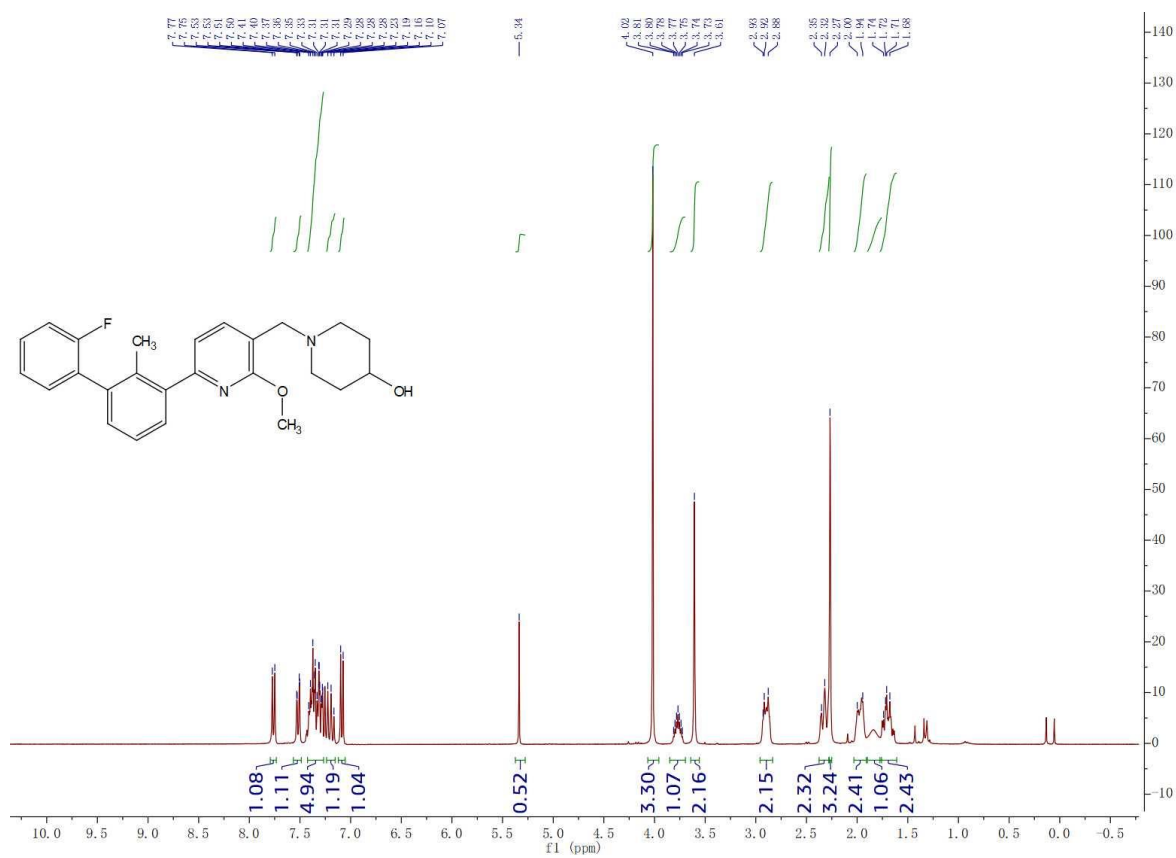

LCMS Spectra for Compound A4



ESI Scan (rt: 1.926 min) Frag=175.0V PL-5-12-p.d

407.2137  
(M+H)<sup>+</sup>

A4

COC1=CC=C(C=C1C2=CC=CC=C2C(F)=C3C=CC(=C3)C=C2C)C4=CC=CC=C4N(CCCO)CC4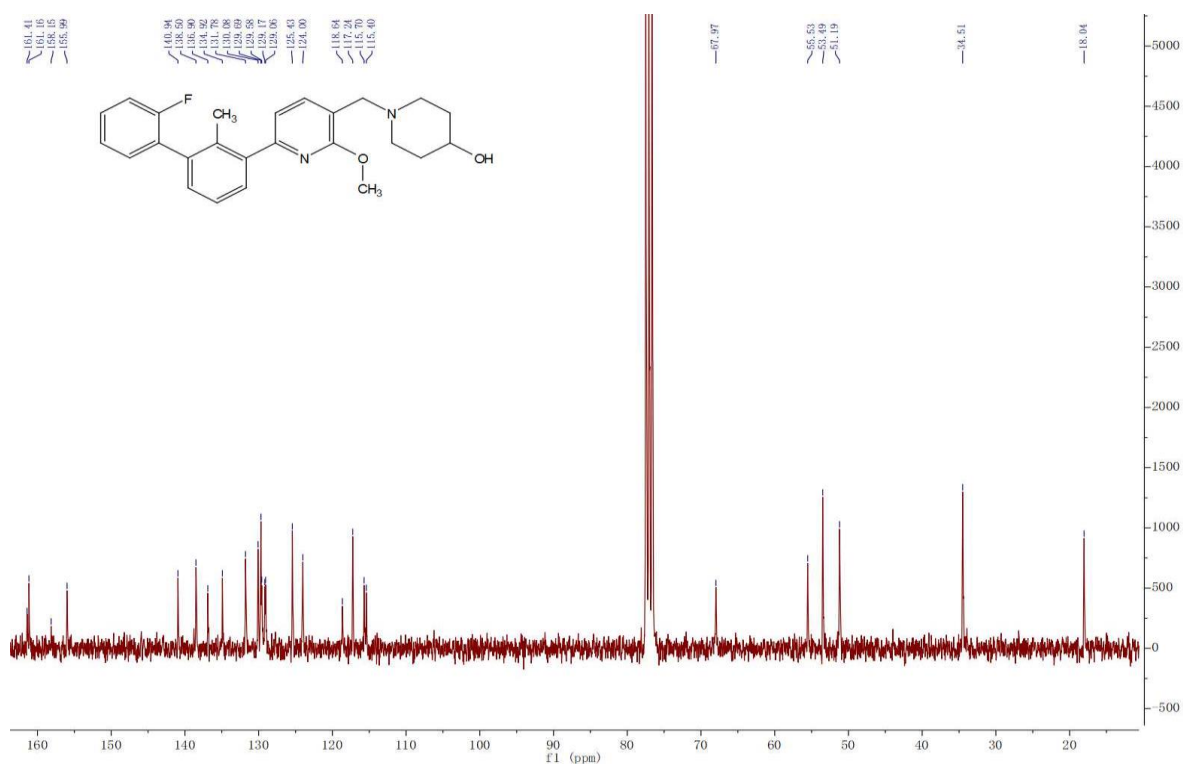

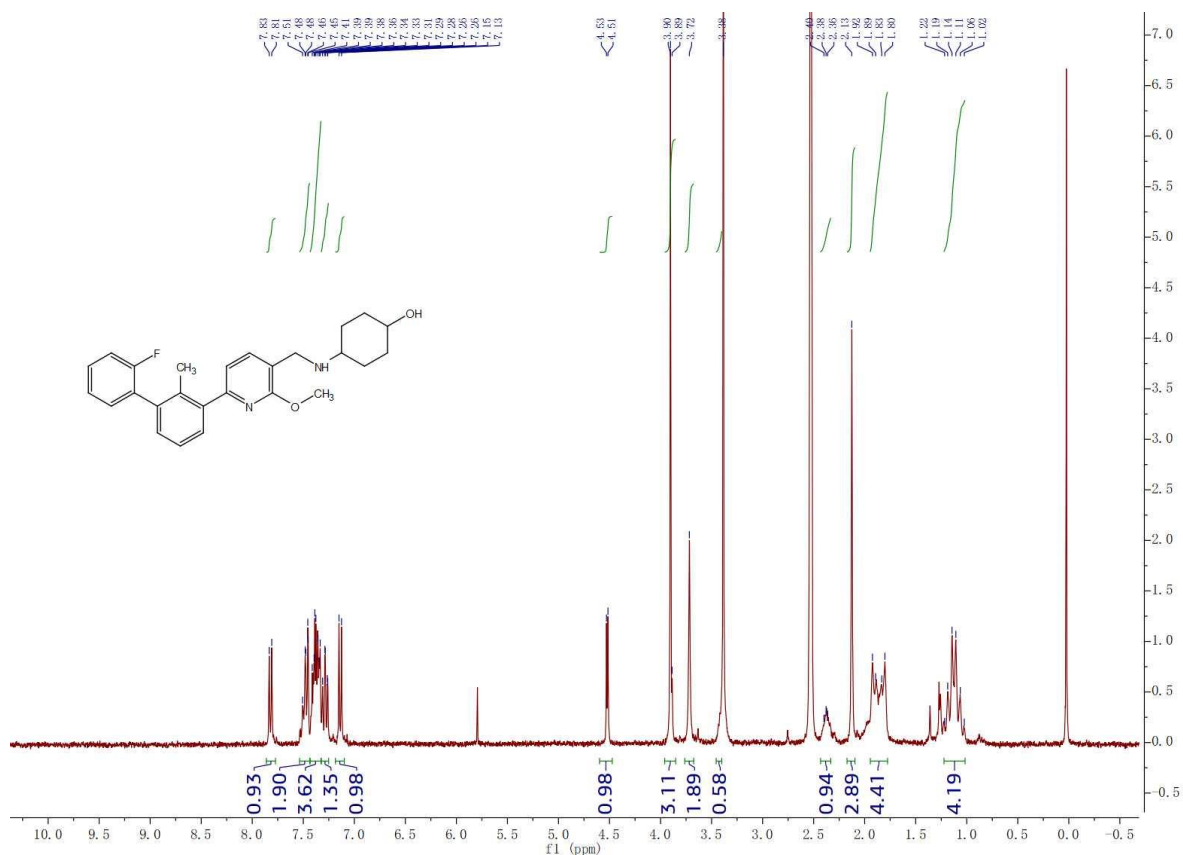

LCMS Spectra for Compound A5

| Sample Name   | Position   | Instrument Name | Instrument 1 | User Name              | G6520B-PC\Admin        |
|---------------|------------|-----------------|--------------|------------------------|------------------------|
| Inj Vol       | p2D3       | Sample Type     | Sample       | IRM Calibration Status | Success                |
| Data Filename | ACQ Method | Comment         |              | Acquired Time          | 12/25/2020 10:01:24 AM |

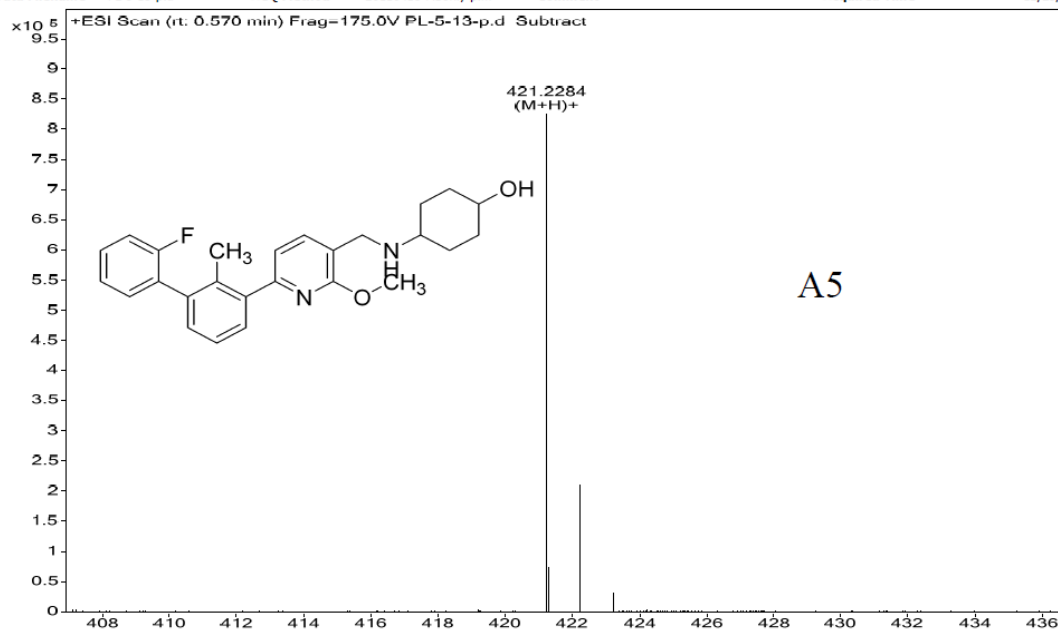

<sup>13</sup>C NMR Spectra for Compound A5

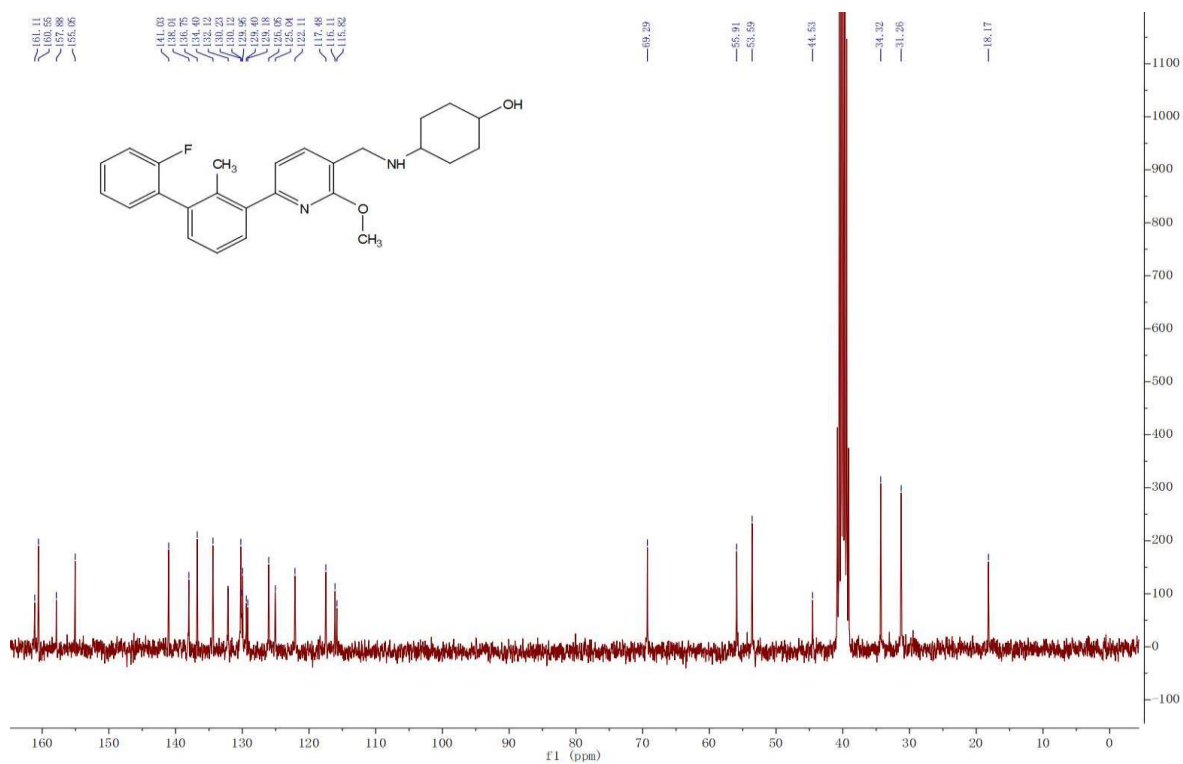

**<sup>1</sup>H NMR Spectra for Compound A6**

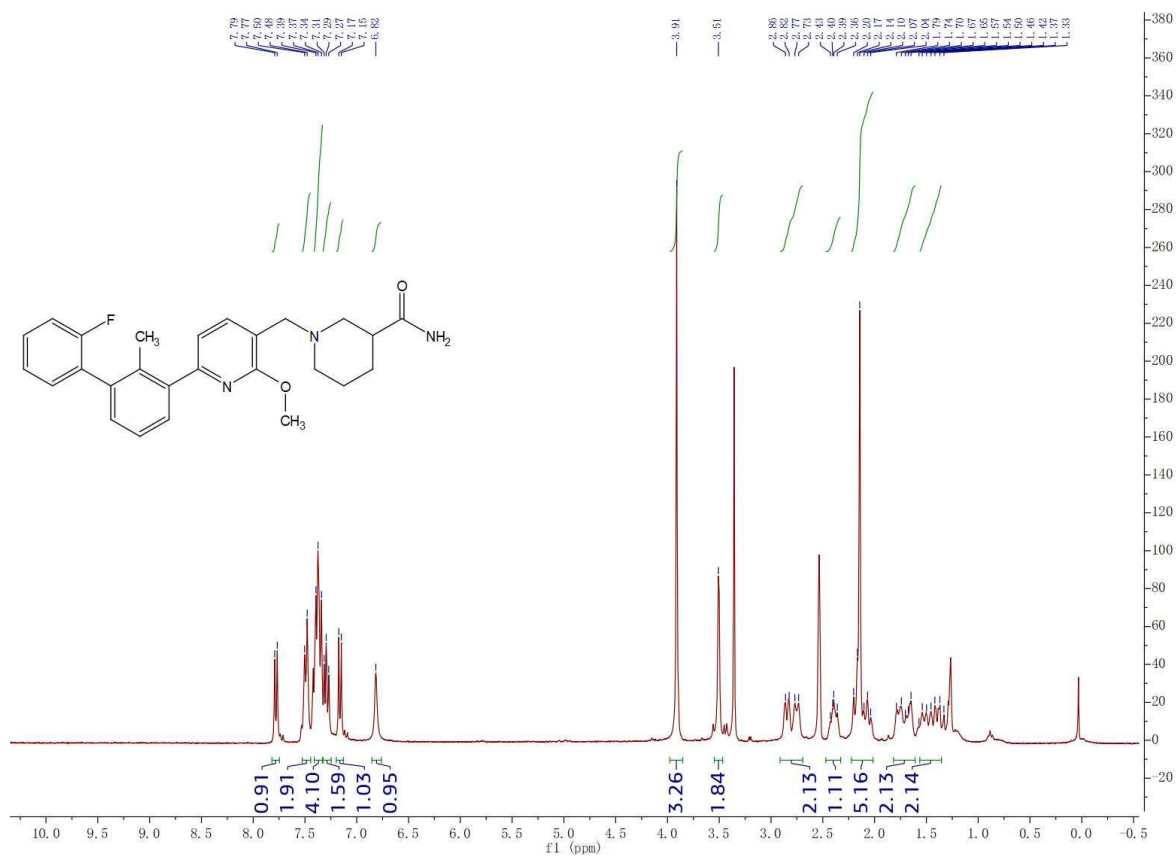

**LCMS Spectra for Compound A6**

| Sample Name   | Position    | Instrument Name | Instrument 1       | User Name              | G6520B-PC\Admin        |
|---------------|-------------|-----------------|--------------------|------------------------|------------------------|
| Inj Vol       | 0.05        | InjPosition     | Sample             | IRM Calibration Status | Success                |
| Data Filename | PL-5-14-p.d | ACQ Method      | 20110418-MOnly-p.m | Acquired Time          | 12/25/2020 10:04:03 AM |

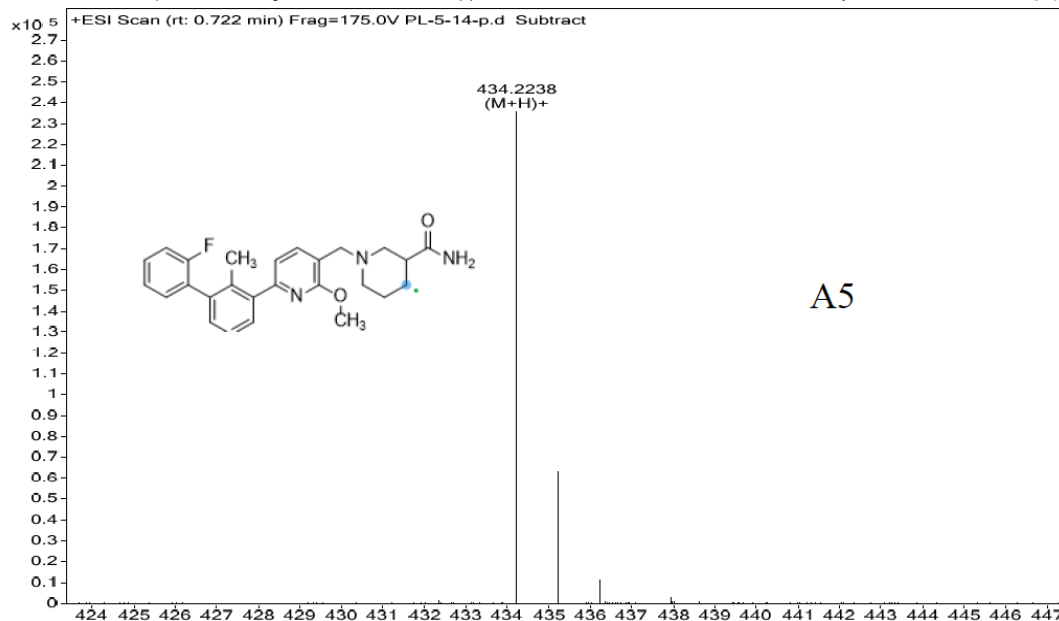

### <sup>13</sup>C NMR Spectra for Compound A6

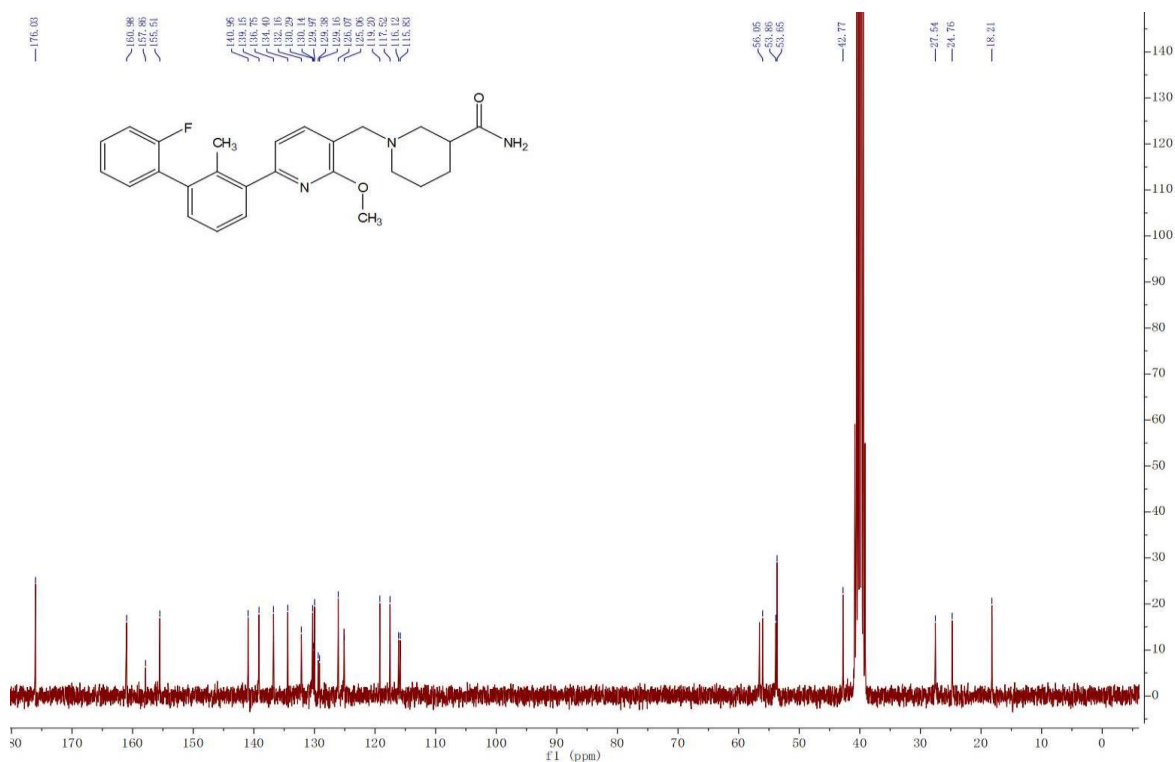

### <sup>1</sup>H NMR Spectra for Compound A7

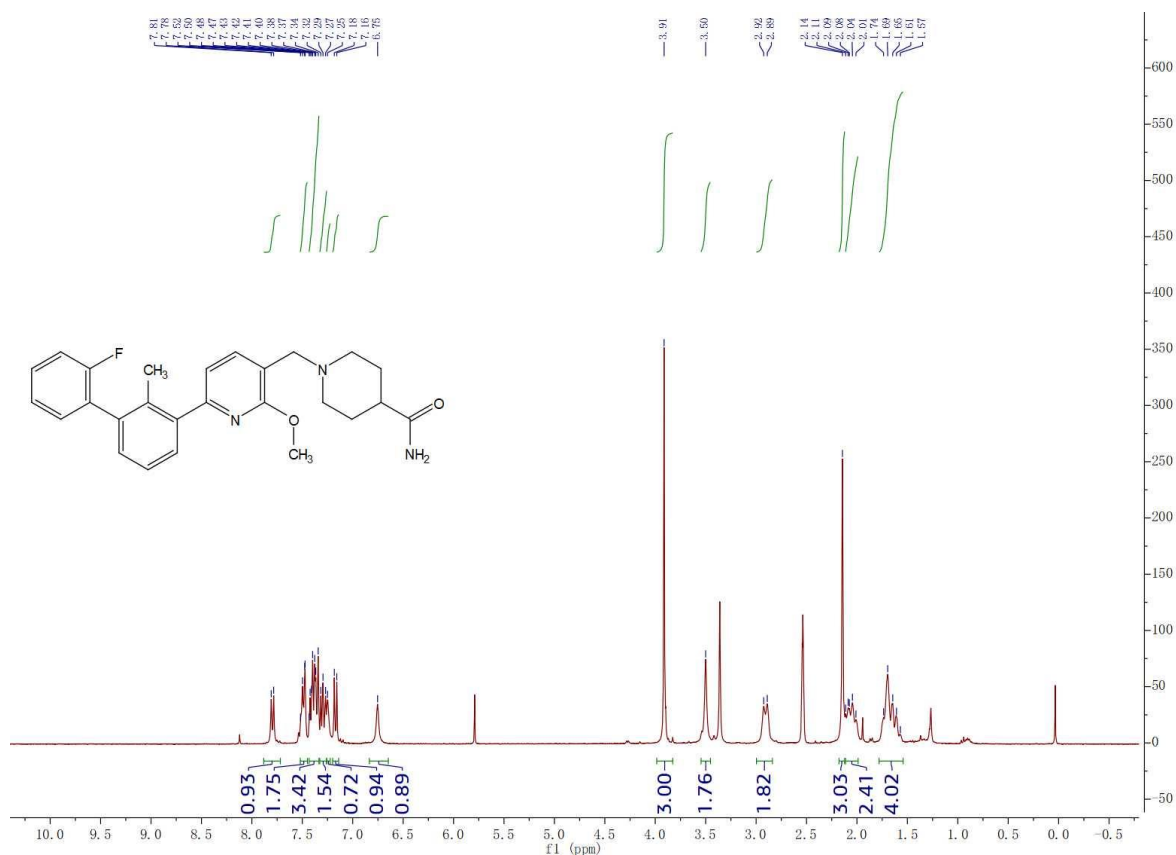



| Sample Name   | Position    | p2D6        | Instrument Name | Instrument 1 | User Name              | G6520B-PC\Admin        |
|---------------|-------------|-------------|-----------------|--------------|------------------------|------------------------|
| Inj Vol       | 0.05        | InjPosition | SampleType      | Sample       | IRM Calibration Status | Success                |
| Data Filename | PL-5-16-p.d | ACQ Method  | Comment         |              | Acquired Time          | 12/25/2020 10:09:41 AM |

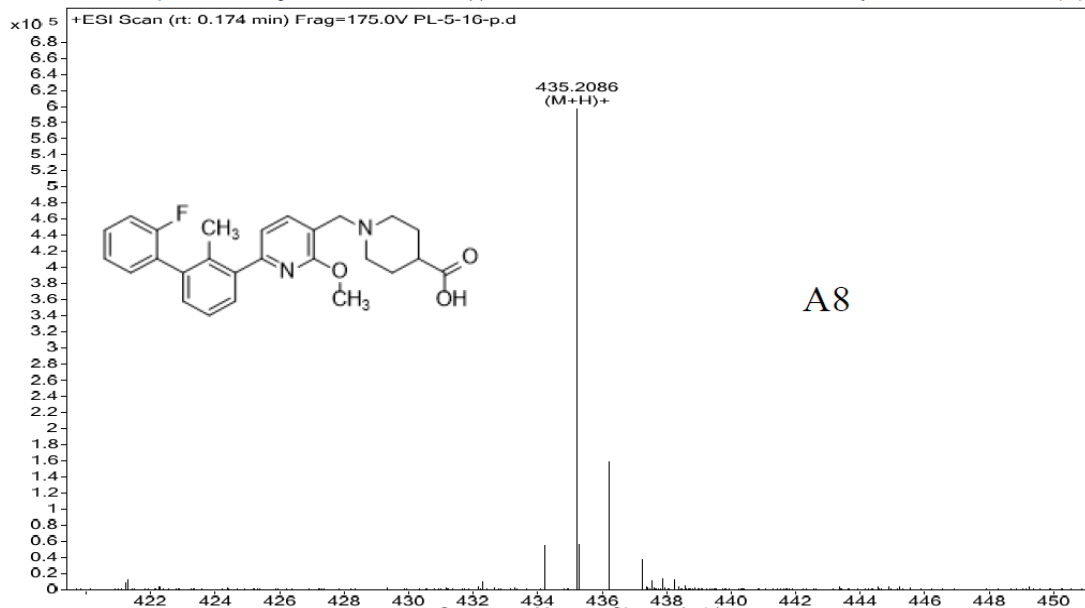

### <sup>13</sup>C NMR Spectra for Compound A8

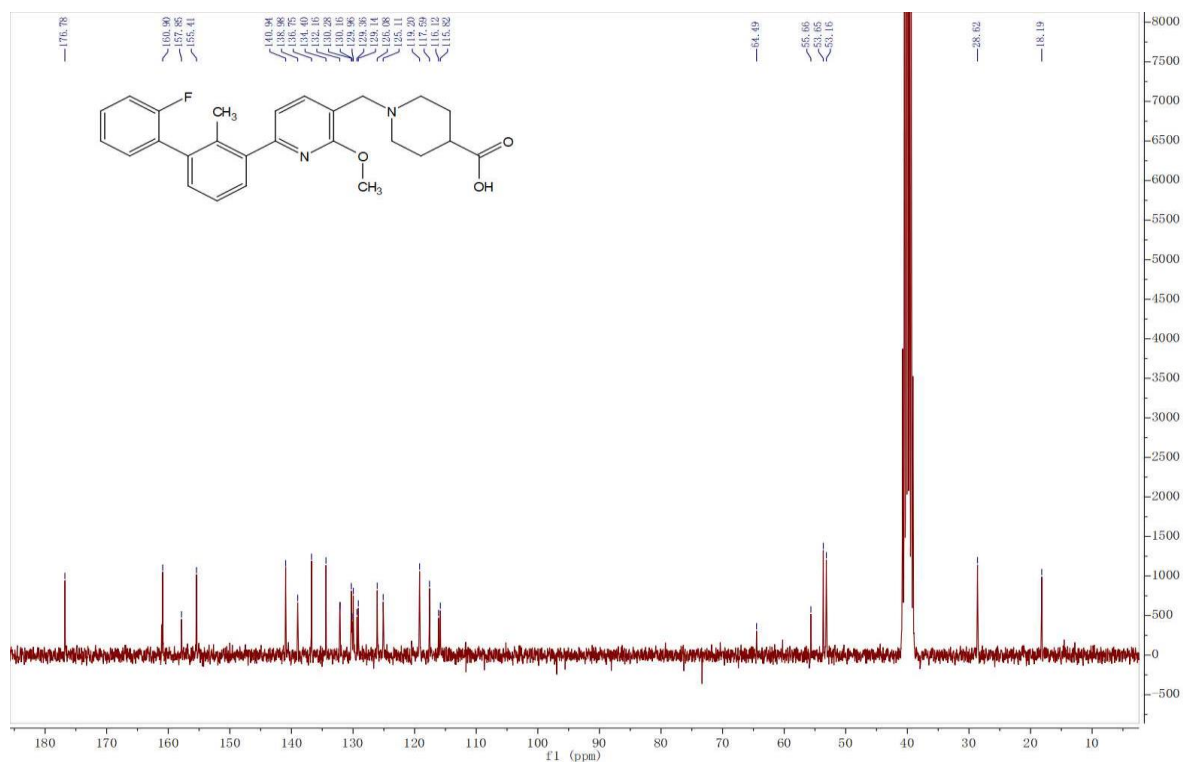

### <sup>1</sup>H NMR Spectra for Compound A9

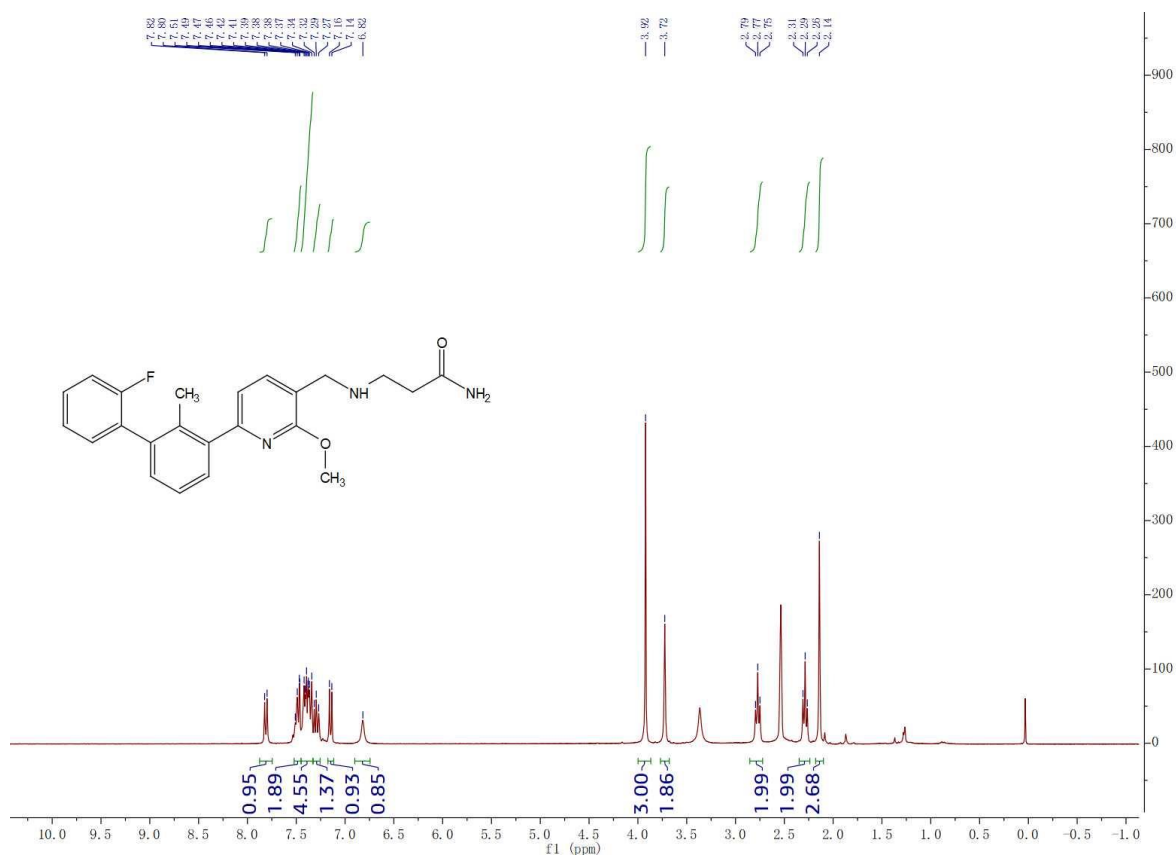

## LCMS Spectra for Compound A9

| Sample Name                     | Position    | Instrument Name | User Name              |
|---------------------------------|-------------|-----------------|------------------------|
| Inj Vol: 0.05                   | p2D8        | Instrument 1    | G65208-PC\Admin        |
| Data Filename: PL-5-20-p.d      | InjPosition | SampleType      | IRM Calibration Status |
| ACQ Method: 20110418-MSonly-p.m | Comment     | Acquired Time   | Success                |
|                                 |             |                 | 12/25/2020 10:44:12 AM |

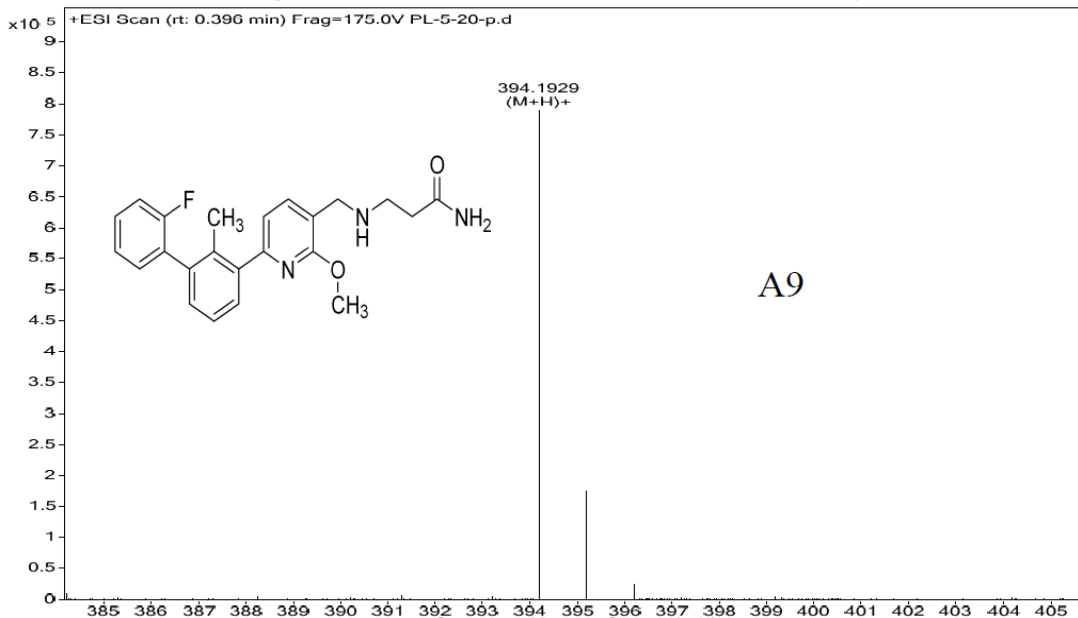

## <sup>13</sup>C NMR Spectra for Compound A9



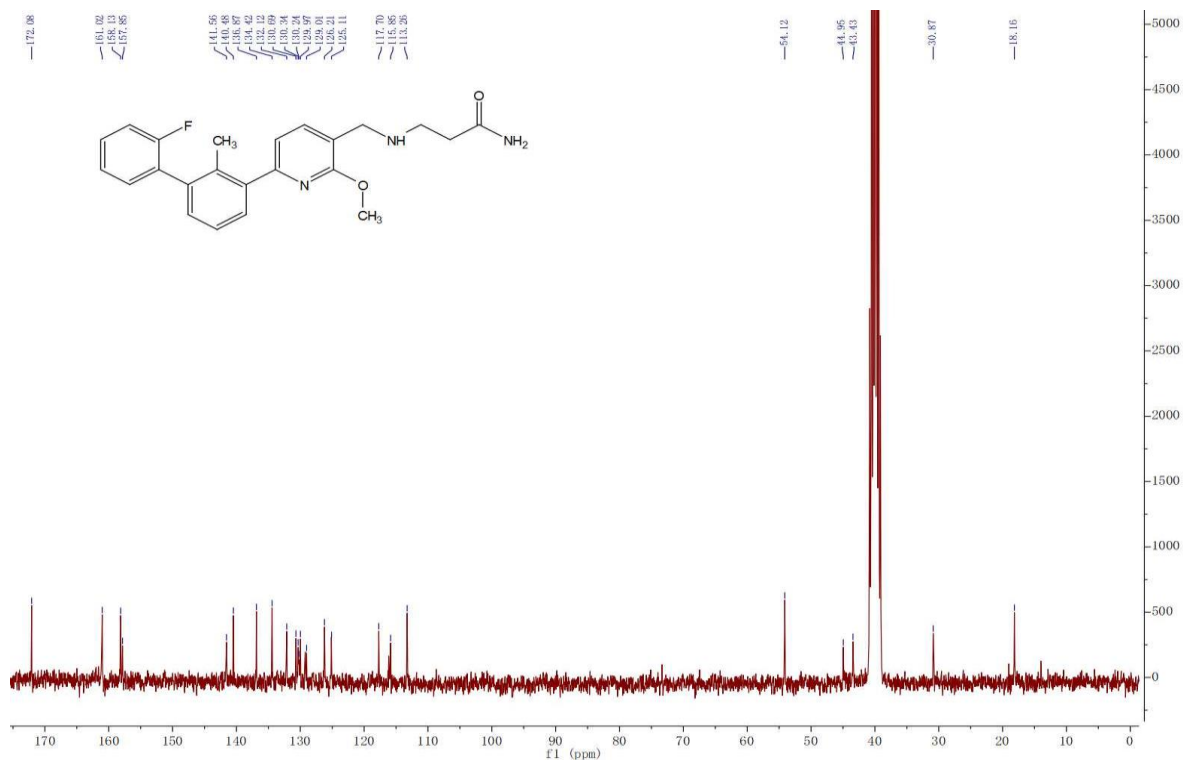

<sup>1</sup>H NMR Spectra for Compound A10

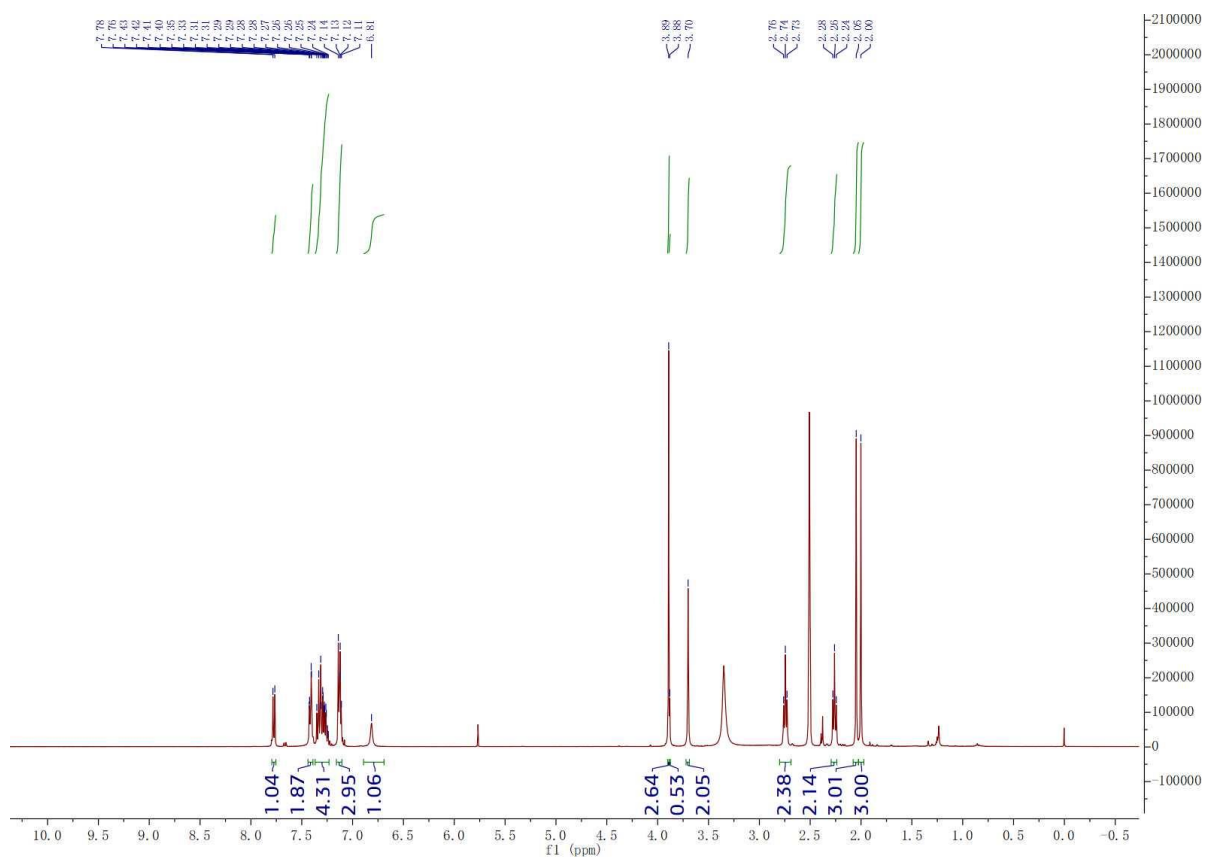

LCMS Spectra for Compound A10

| Sample Name   | Position    | p2e2                | Instrument Name | Instrument 1 | User Name              | G6520B-PC\Admin        |
|---------------|-------------|---------------------|-----------------|--------------|------------------------|------------------------|
| Inj Vol       | 0.05        |                     | Sample Type     | Sample       | IRM Calibration Status | Success                |
| Data Filename | PL-5-24-p.d | 20110418-MSonly-p.m | Comment         |              | Acquired Time          | 12/25/2020 10:57:39 AM |

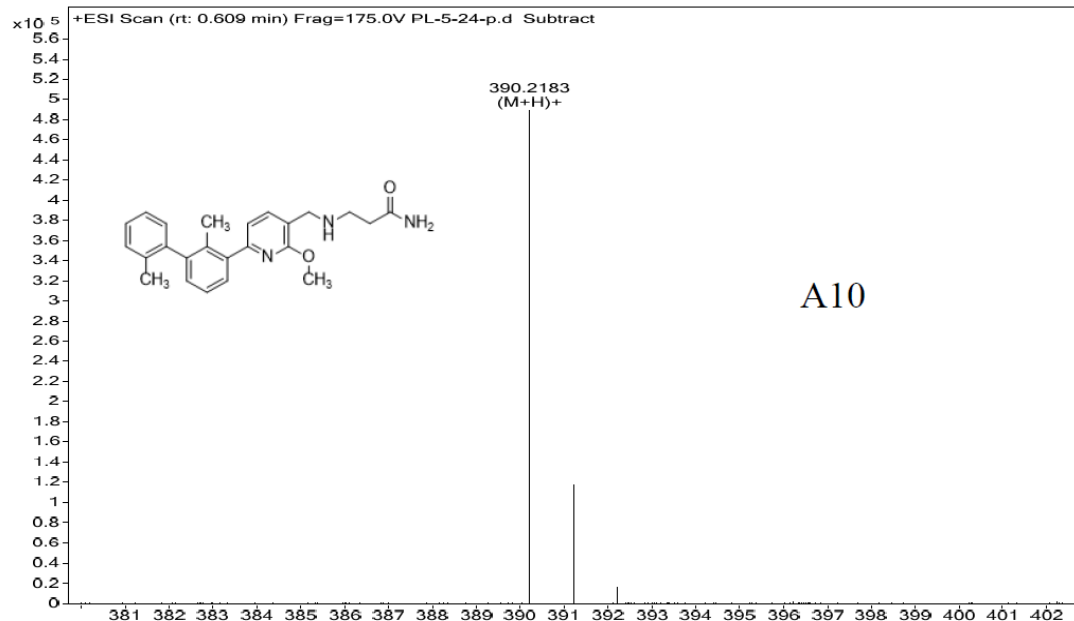

### <sup>13</sup>C NMR Spectra for Compound A10

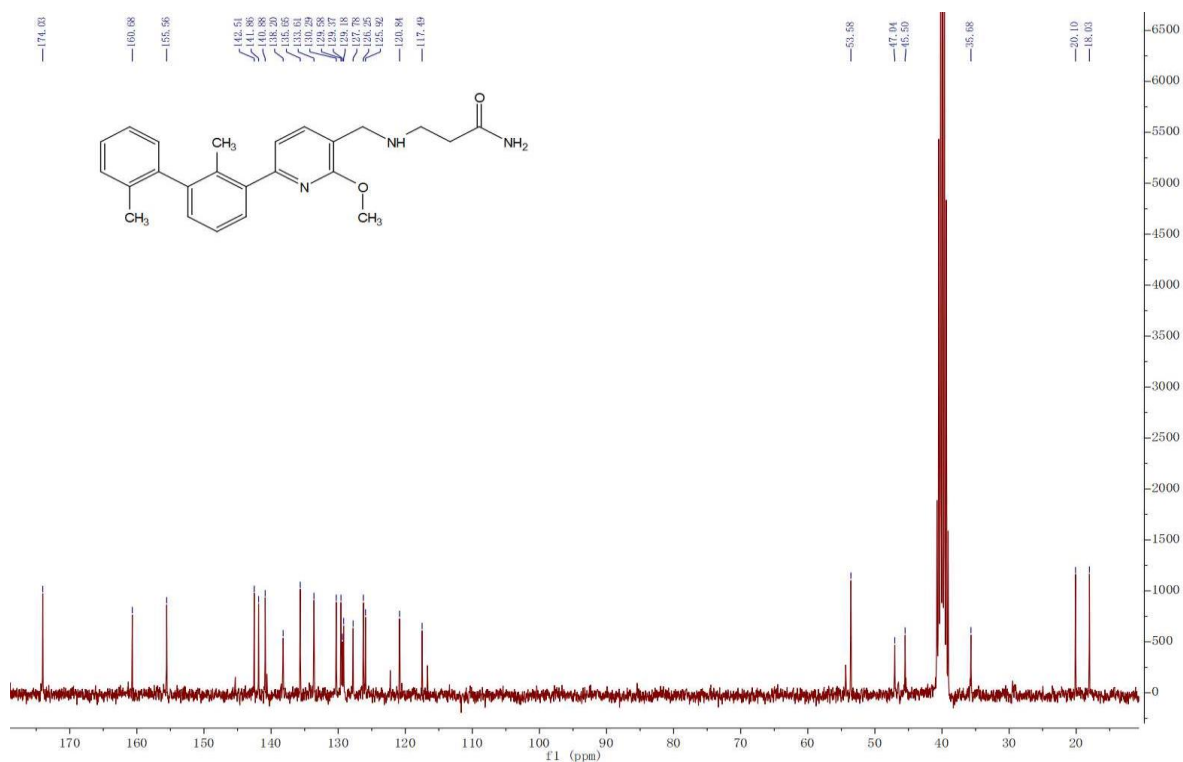

### <sup>1</sup>H NMR Spectra for Compound A11

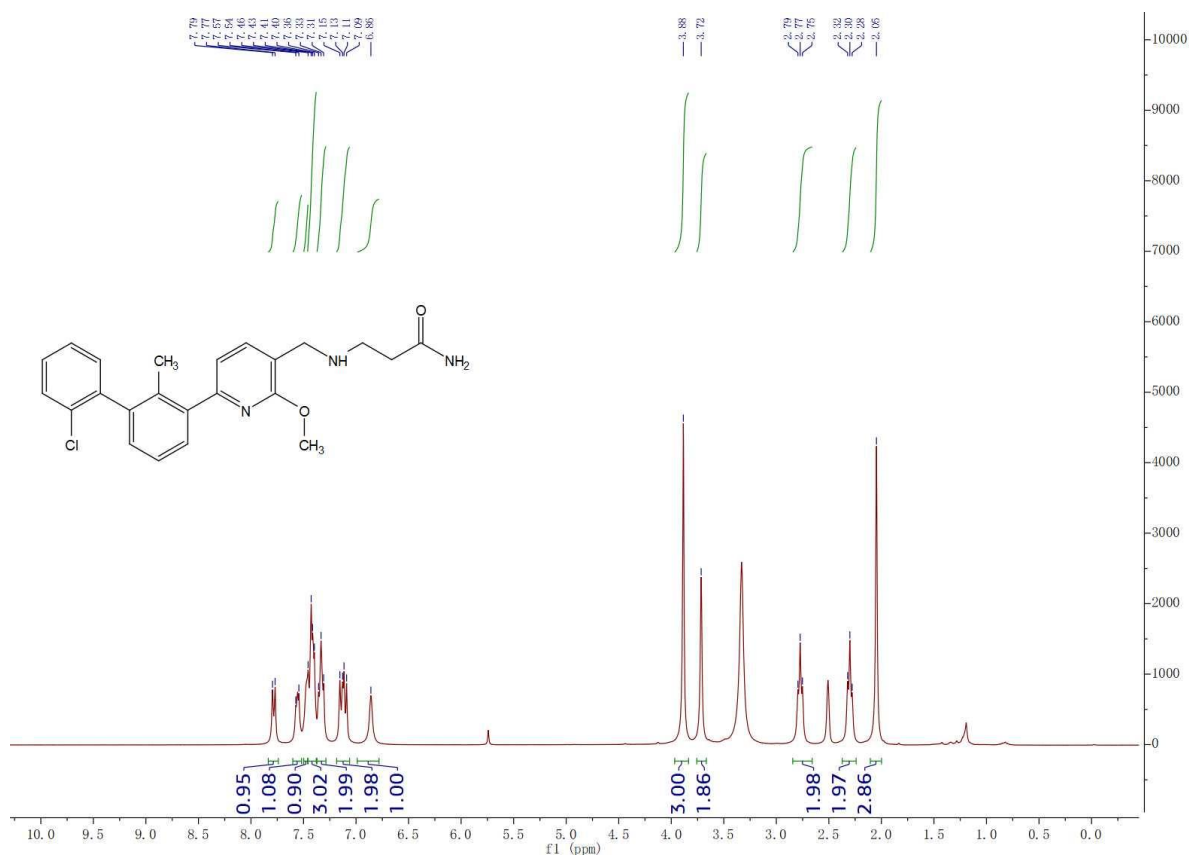

## LCMS Spectra for Compound A11

| Sample Name                | Position                        | Instrument Name    | Instrument 1 | User Name              | G6520B-PC\Admin        |
|----------------------------|---------------------------------|--------------------|--------------|------------------------|------------------------|
| Inj Vol: 0.05              | InjPosition: p2e3               | SampleType: Sample | Sample       | IRM Calibration Status | Success                |
| Data Filename: PL-5-25-p.d | ACQ Method: 20110418-MSonly-p.m | Comment:           |              | Acquired Time          | 12/25/2020 11:00:37 AM |

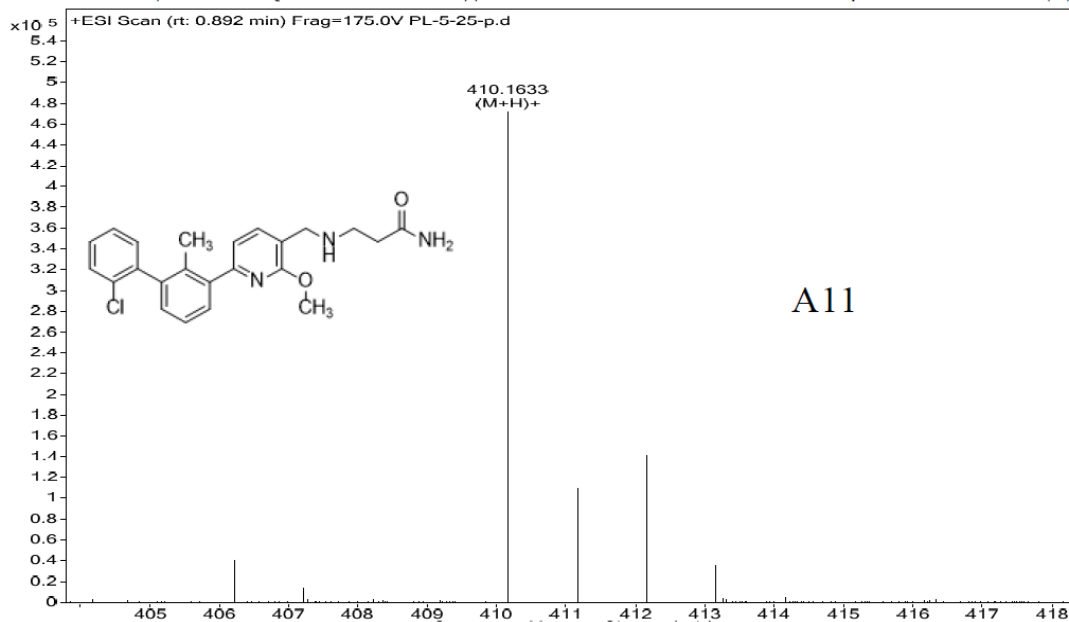

## <sup>13</sup>C NMR Spectra for Compound A11

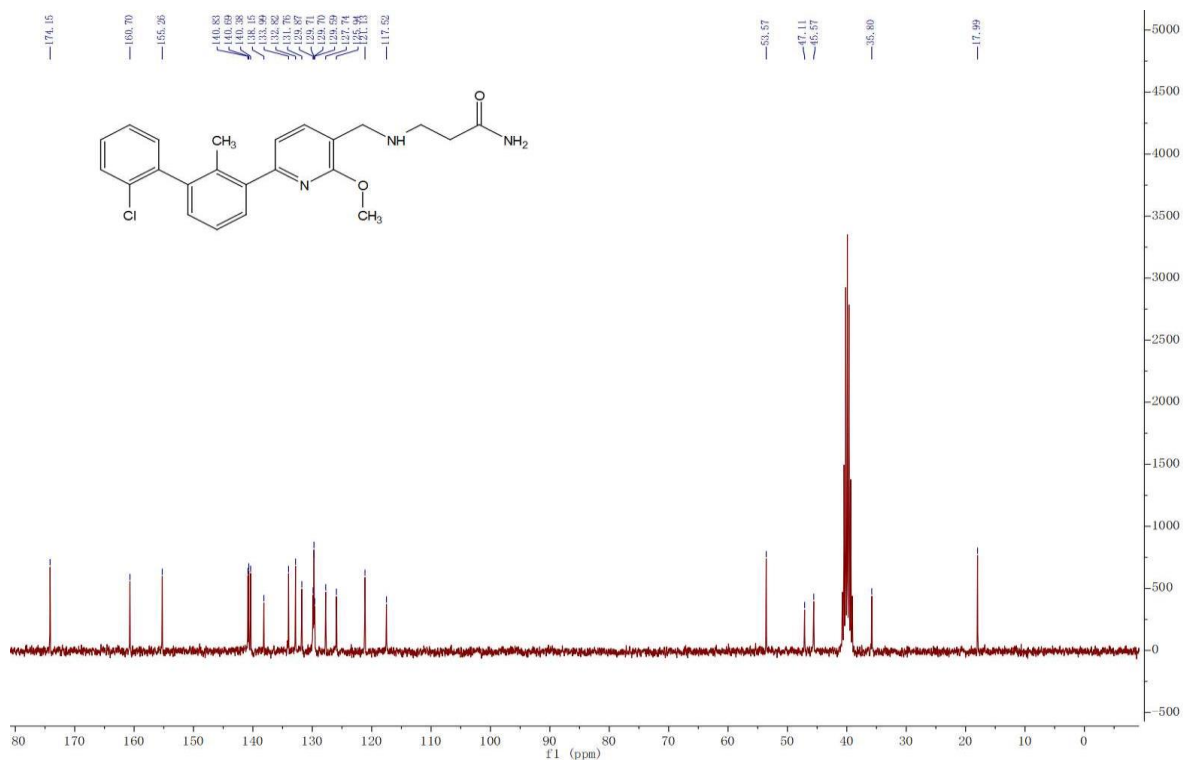

<sup>1</sup>H NMR Spectra for Compound A12

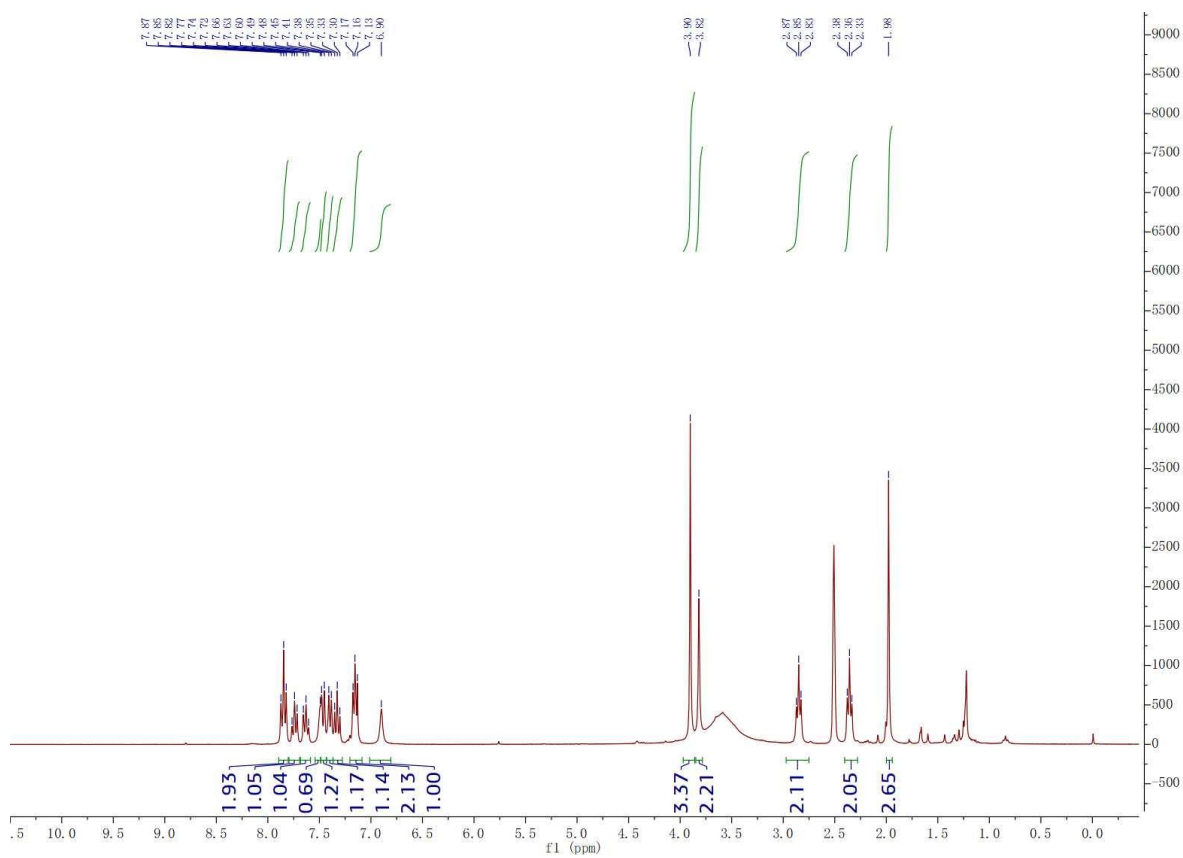

LCMS Spectra for Compound A12

| Sample Name               | Position                       | Instrument Name | User Name              | G6520B-PC\Admin        |
|---------------------------|--------------------------------|-----------------|------------------------|------------------------|
| Inj Vol 0.05              | InjPosition p2e4               | Instrument 1    | IRM Calibration Status | Success                |
| Data Filename PL-5-26-p.d | ACQ Method 20110418-MSonly-p.m | Sample          | Acquired Time          | 12/25/2020 11:03:10 AM |

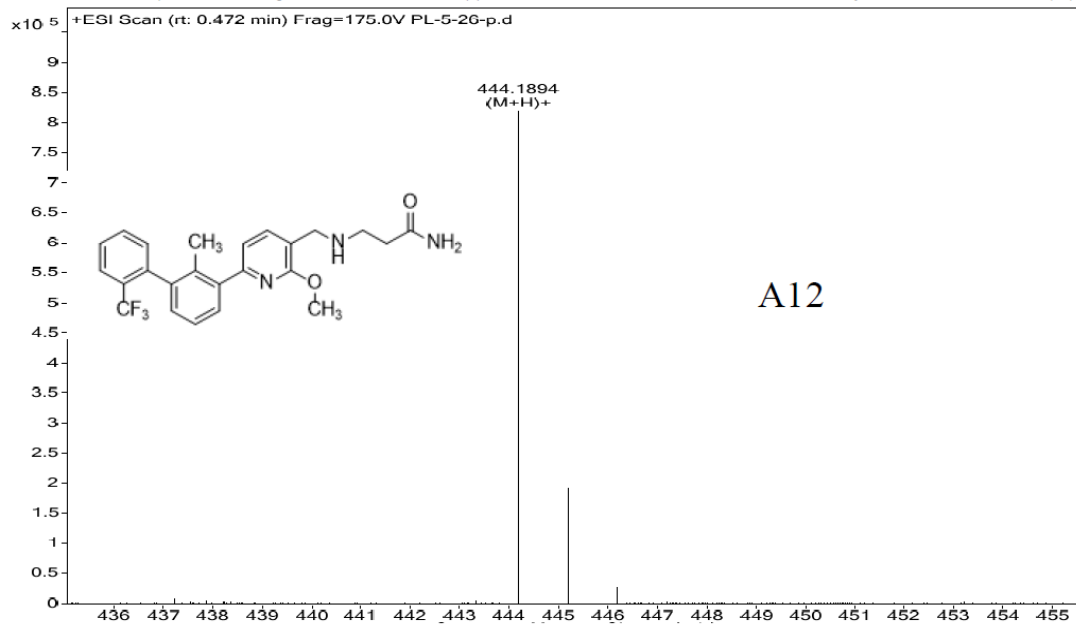

### <sup>13</sup>C NMR Spectra for Compound A12

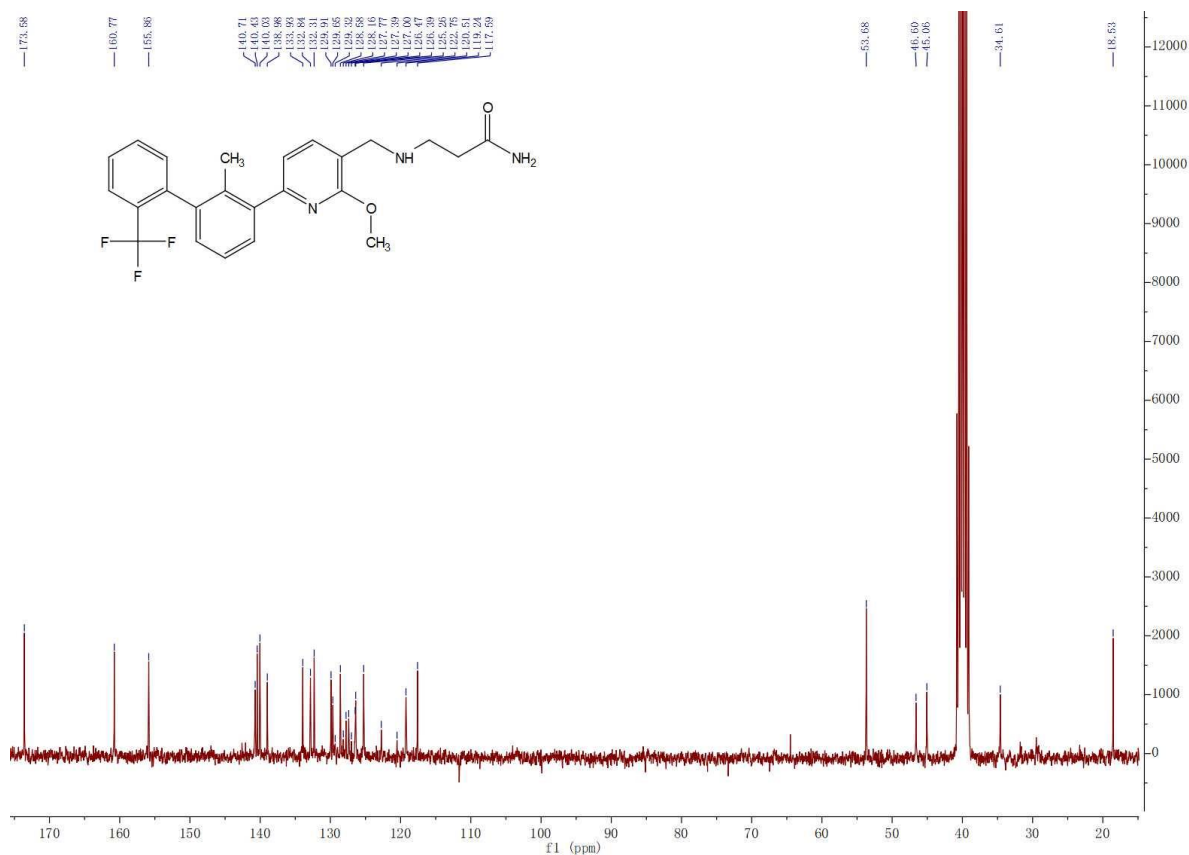

### <sup>1</sup>H NMR Spectra for Compound A13



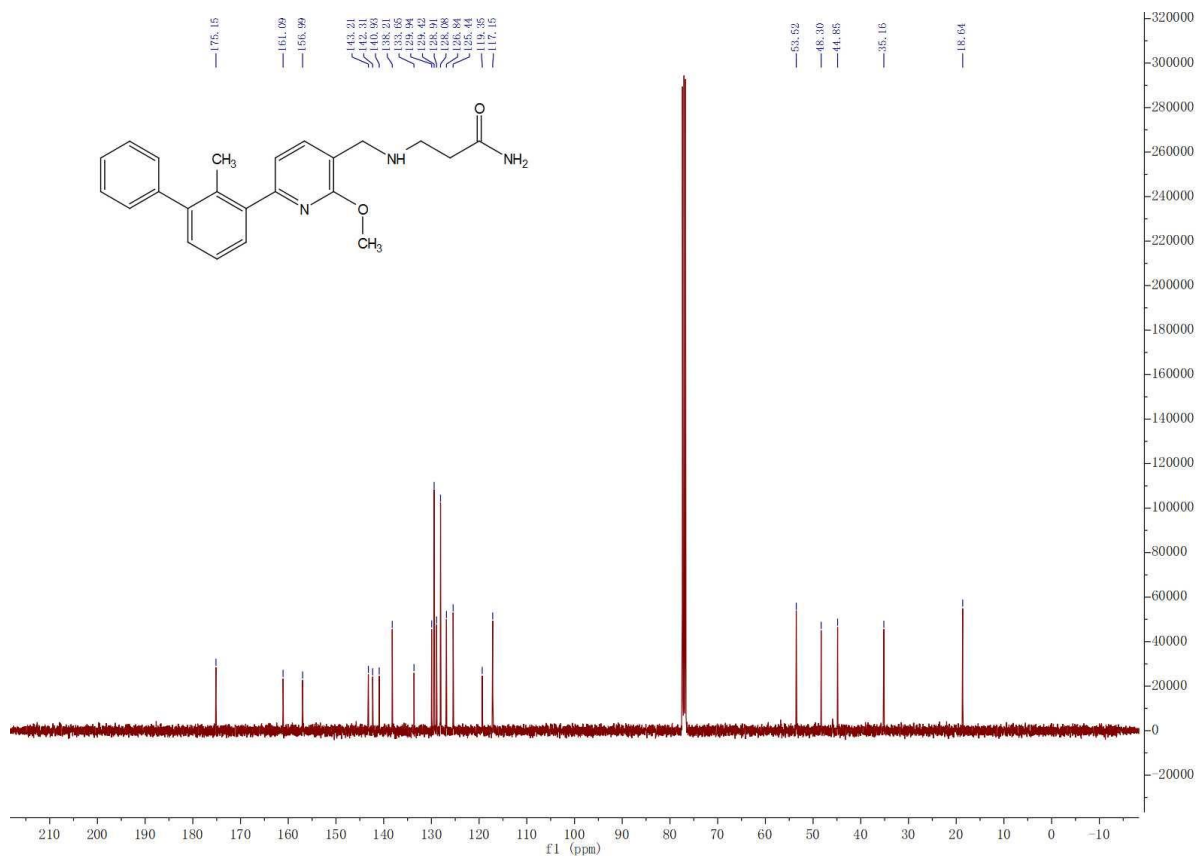

<sup>1</sup>H NMR Spectra for Compound A14

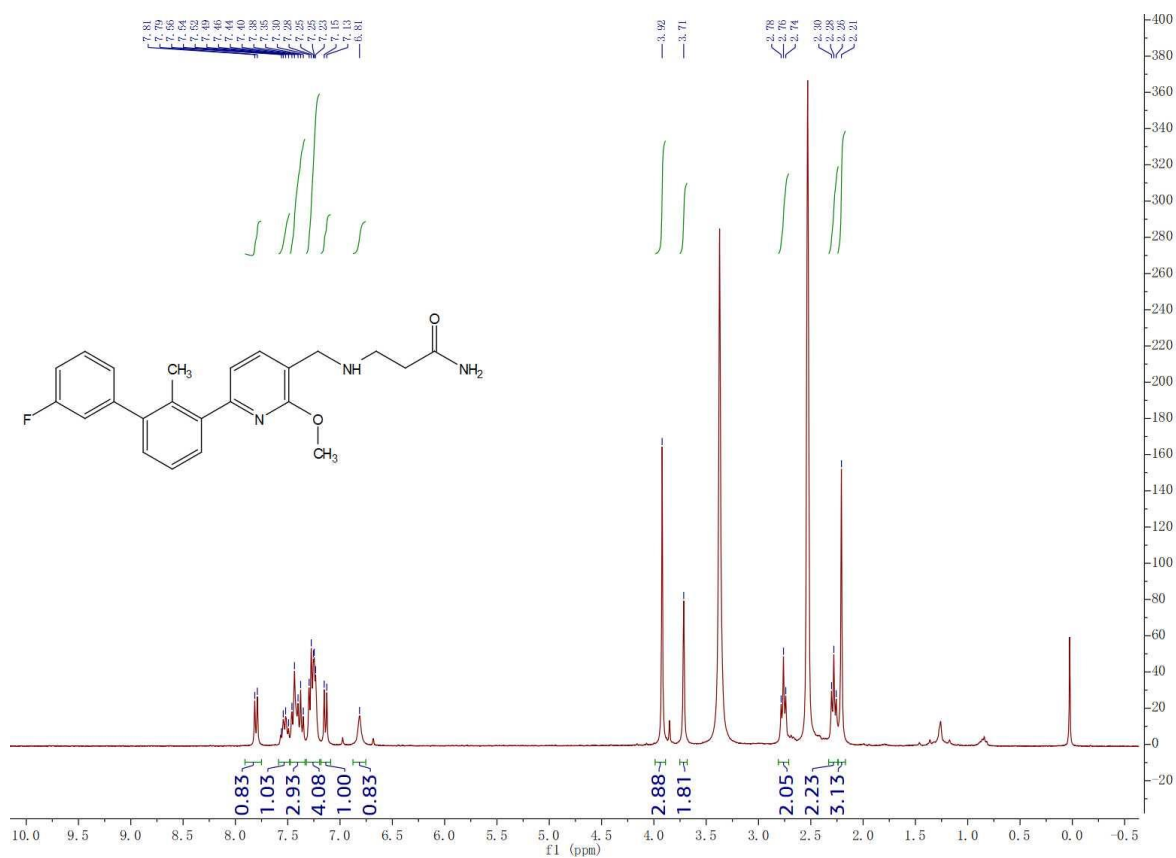

LCMS Spectra for Compound A14

| Sample Name   | Position           | Instrument Name | User Name              |
|---------------|--------------------|-----------------|------------------------|
| Inj Vol       | p2e6               | Instrument 1    | G65208-PC\Admin        |
| Data Filename | PL-5-28-p.d        | Sample          | Success                |
|               | ACQ Method         | Comment         | IRM Calibration Status |
|               | 20110418-MOnly-p.m |                 | Acquired Time          |
|               |                    |                 | 12/25/2020 11:05:50 AM |

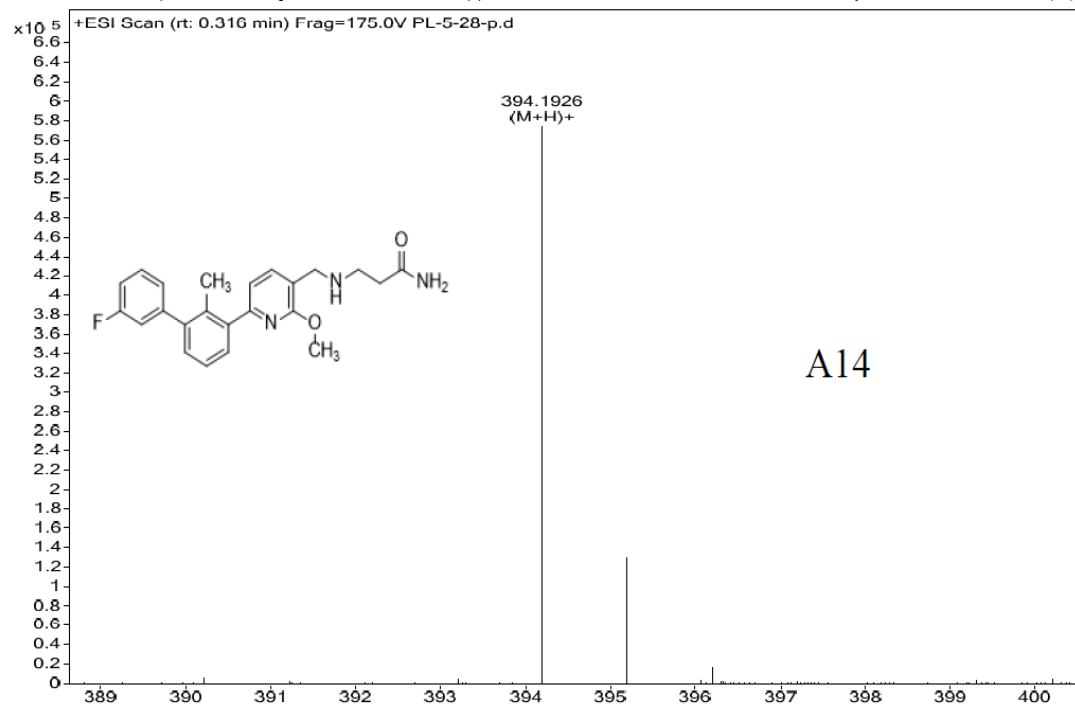

### <sup>13</sup>C NMR Spectra for Compound A14

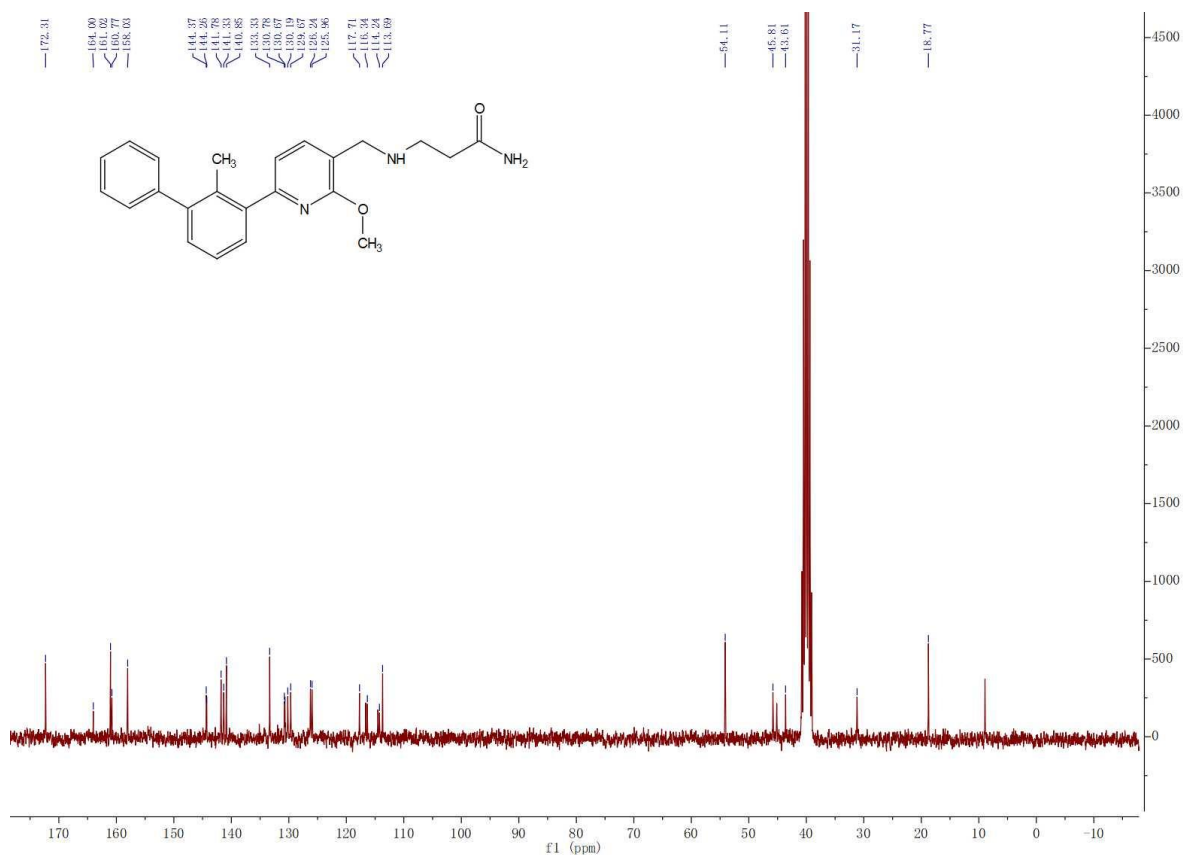

### <sup>1</sup>H NMR Spectra for Compound A15



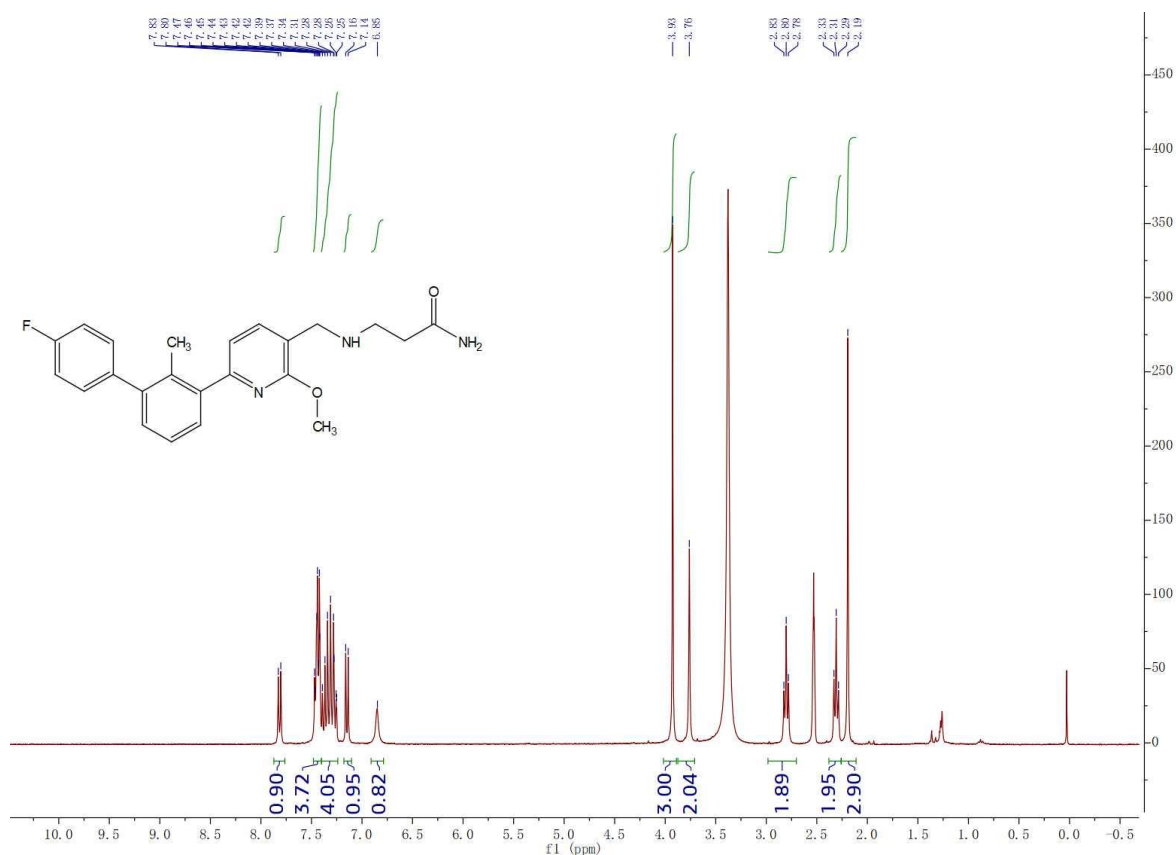

## LCMS Spectra for Compound A15

| Sample Name   | Position            | Instrument Name | User Name              |
|---------------|---------------------|-----------------|------------------------|
| Inj Vol       | p2e7                | Instrument 1    | G6520B-PC\Admin        |
| Data Filename | PL-5-29-p.d         | Sample          | Success                |
|               | ACQ Method          | Comment         | Acquired Time          |
|               | 20110418-MSonly-p.m |                 | 12/25/2020 11:10:01 AM |

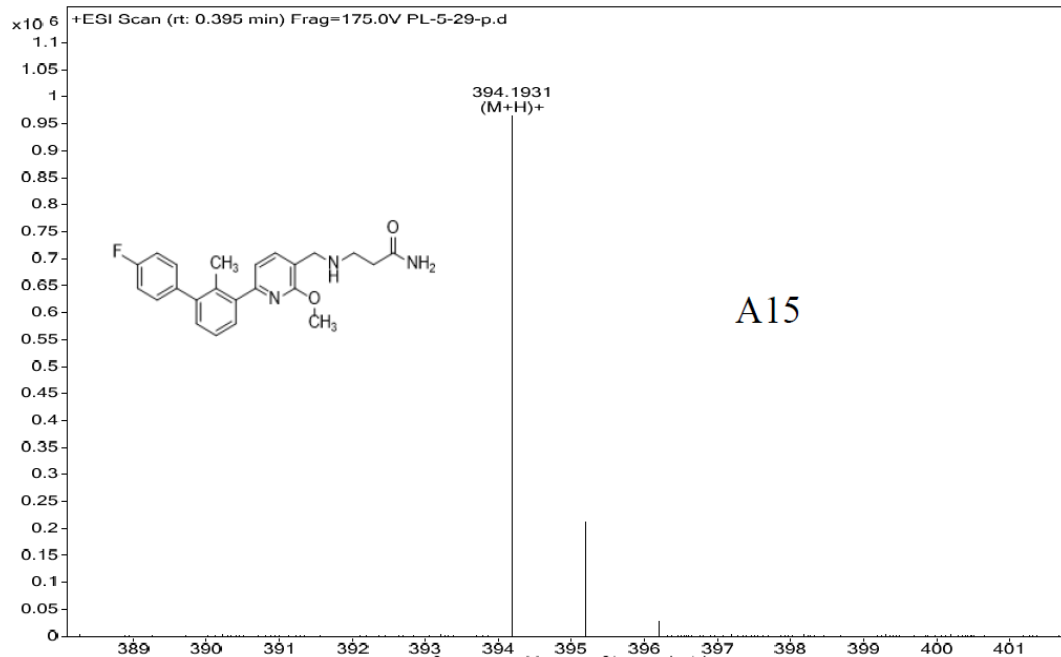

## <sup>13</sup>C NMR Spectra for Compound A15

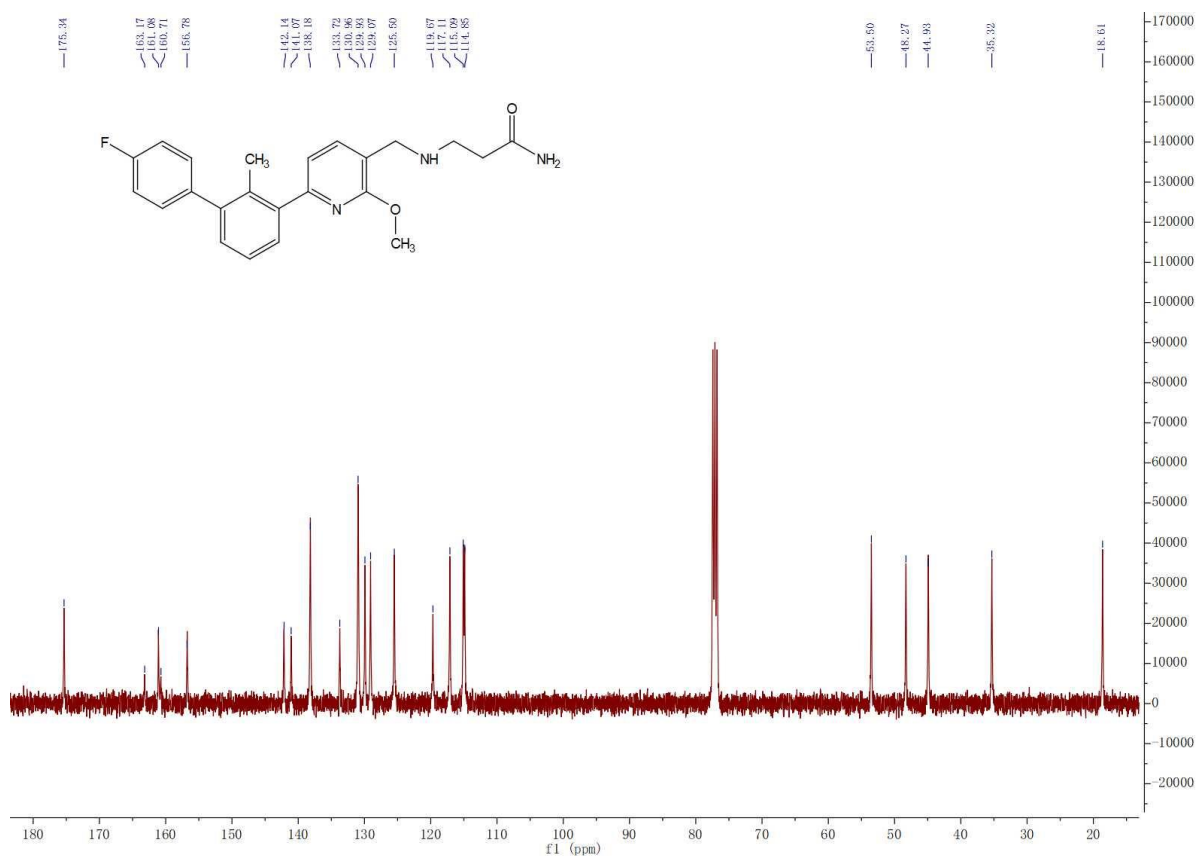

**<sup>1</sup>H NMR Spectra for Compound A16**

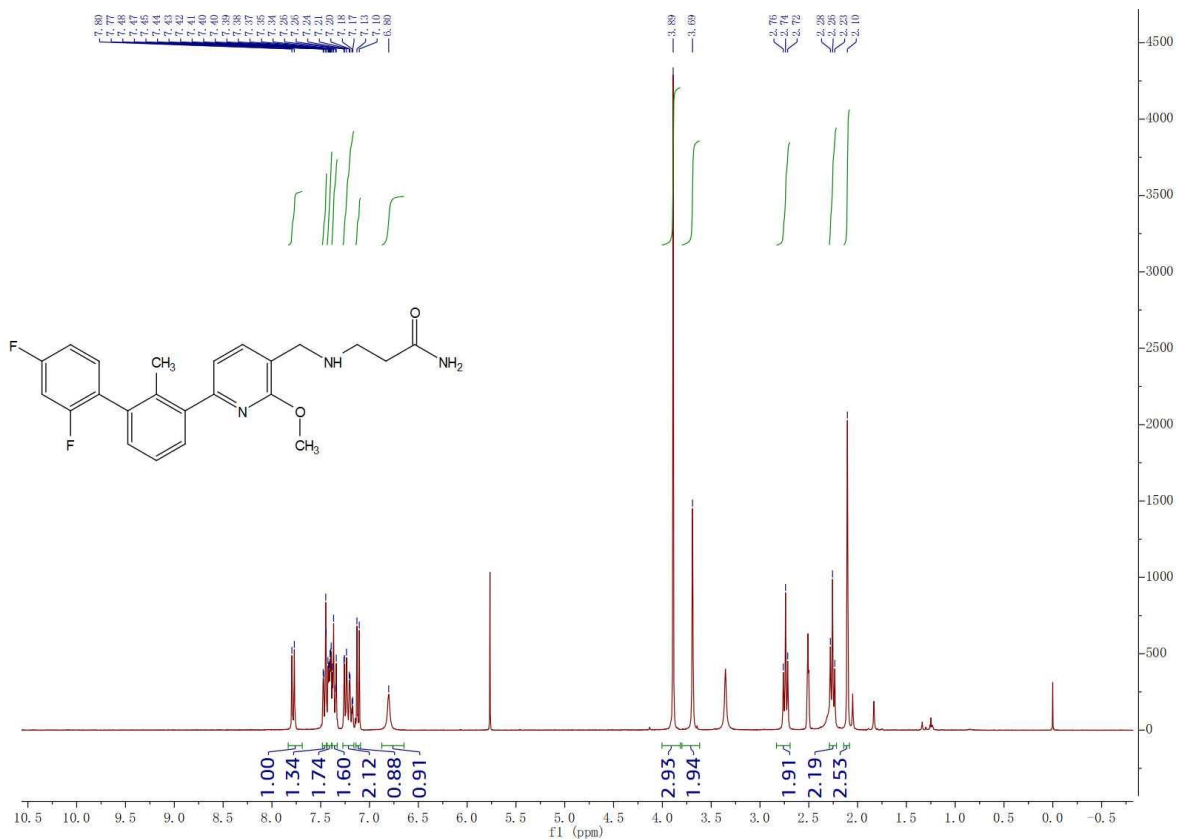

**LCMS Spectra for Compound A16**

| Sample Name               | Position                       | Instrument Name | Instrument 1 | User Name              | G6520B-PC\Admin        |
|---------------------------|--------------------------------|-----------------|--------------|------------------------|------------------------|
| Inj Vol 0.05              | InjPosition p2e8               | SampleType      | Sample       | IRM Calibration Status | Success                |
| Data Filename PL-5-30-p.d | ACQ Method 20110418-MSonly-p.m | Comment         |              | Acquired Time          | 12/25/2020 11:12:06 AM |

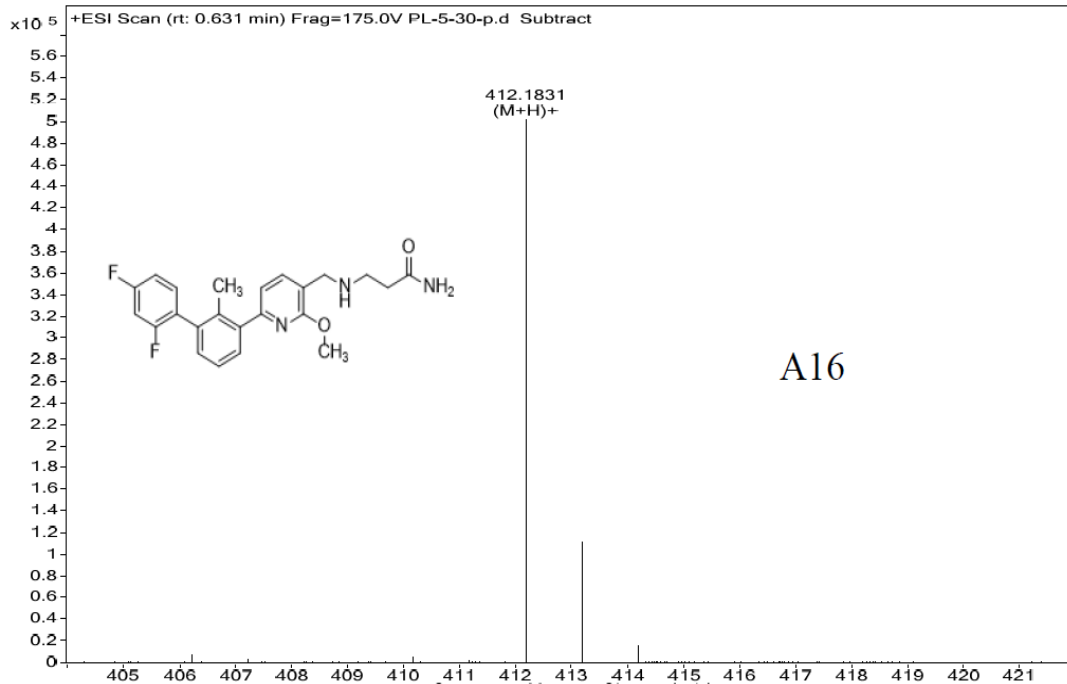

### <sup>13</sup>C NMR Spectra for Compound A16

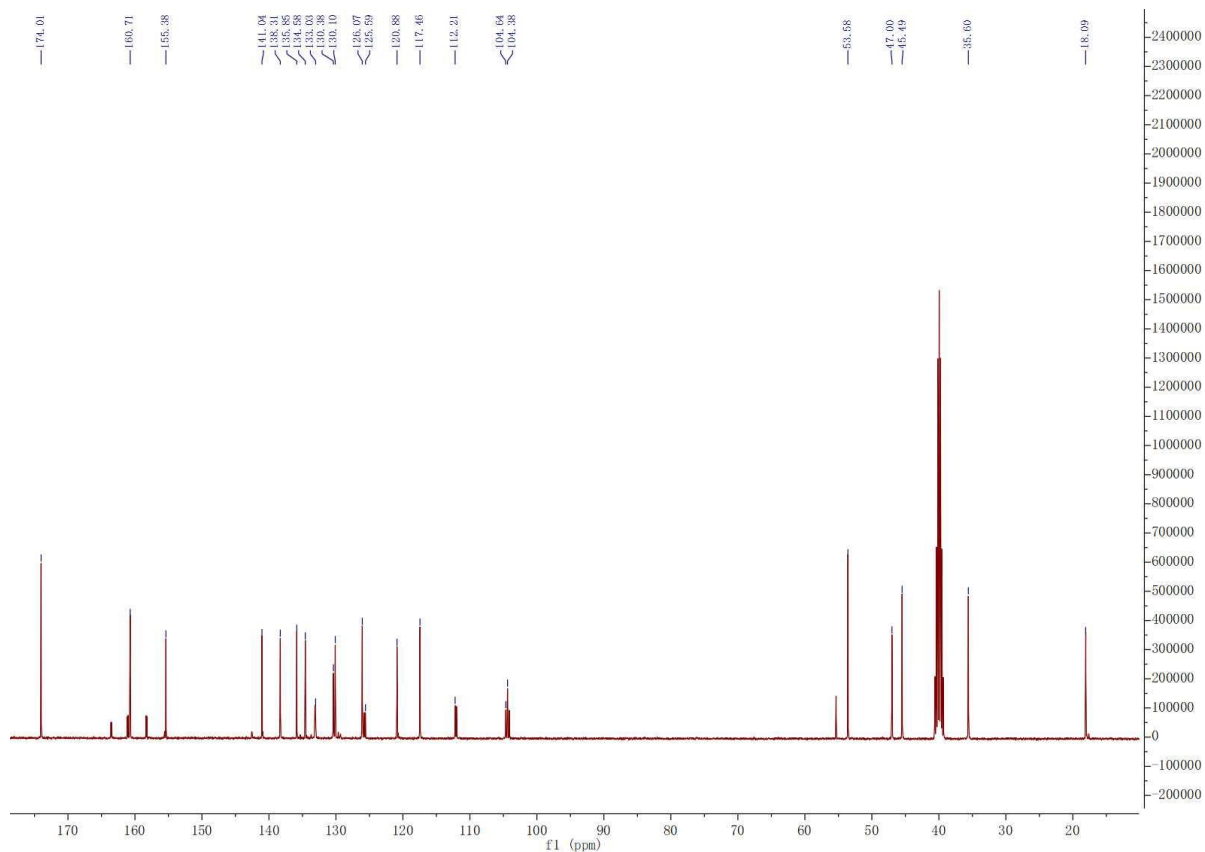

### <sup>1</sup>H NMR Spectra for Compound A17

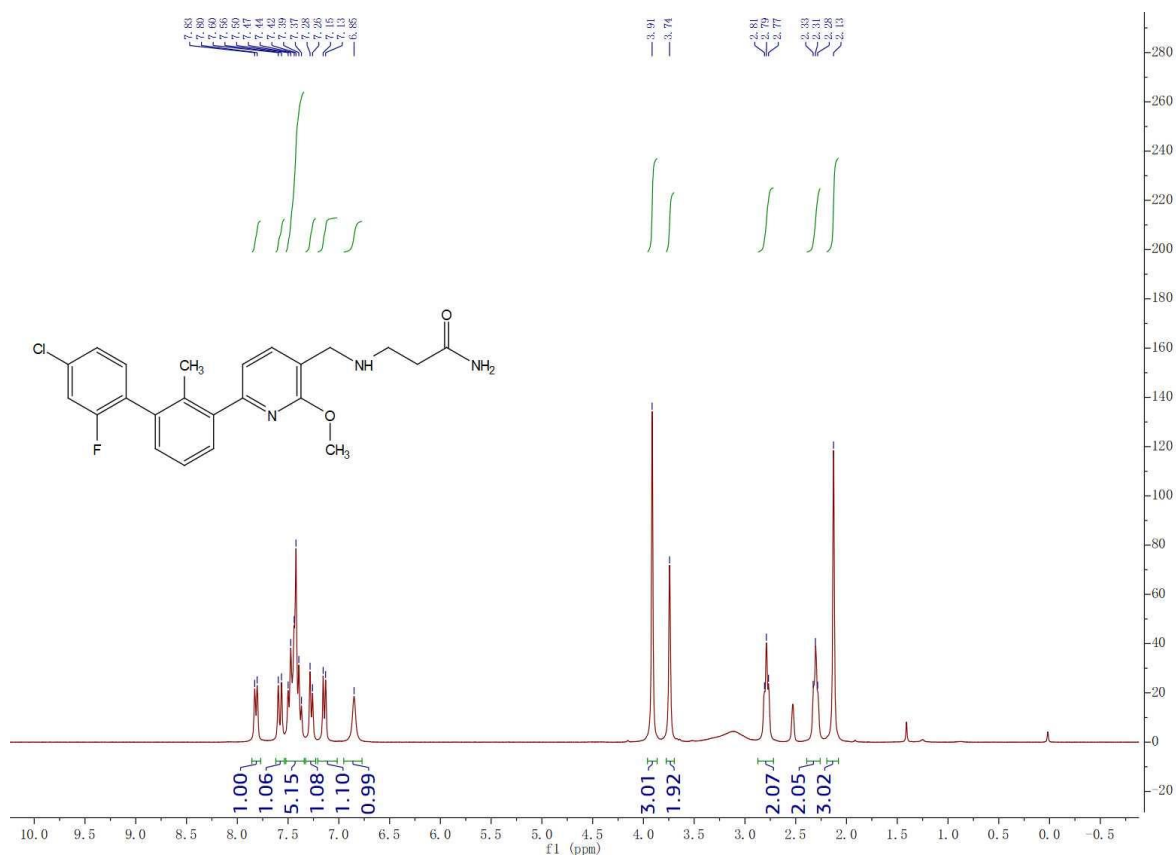

## LCMS Spectra for Compound A17

| Sample Name               | Position                       | Instrument Name | Instrument 1 | User Name              | G6520B-PC\Admin        |
|---------------------------|--------------------------------|-----------------|--------------|------------------------|------------------------|
| Inj Vol 0.05              | InjPosition p2e9               | SampleType      | Sample       | IRM Calibration Status | Success                |
| Data Filename PL-5-31-p.d | ACQ Method 20110418-MSonly-p.m | Comment         |              | Acquired Time          | 12/25/2020 11:14:33 AM |

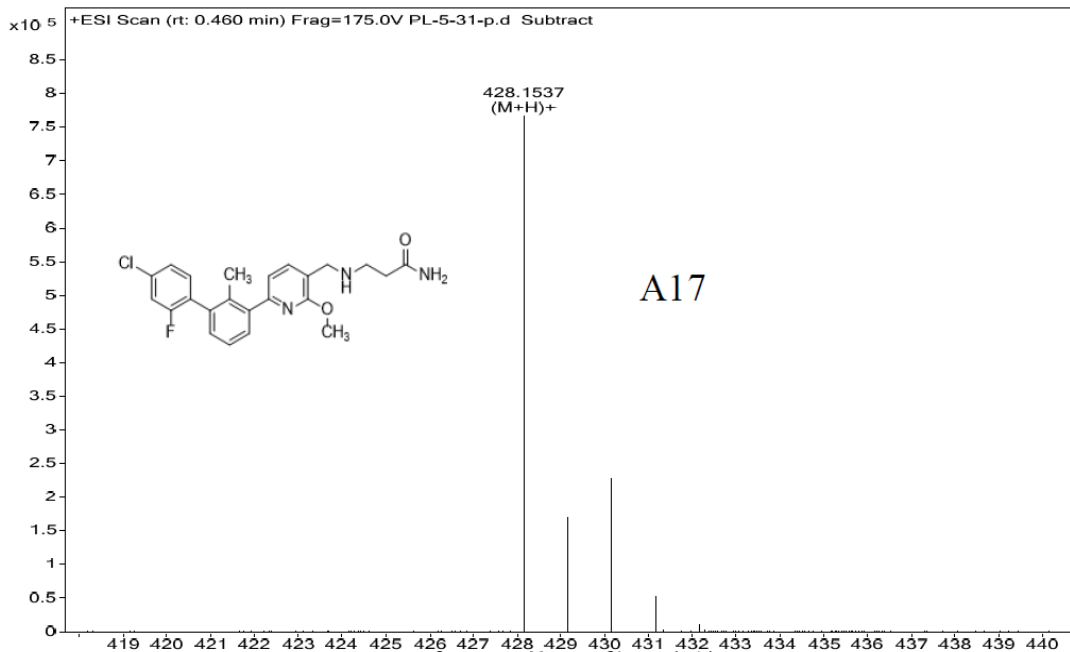

## <sup>13</sup>C NMR Spectra for Compound A17

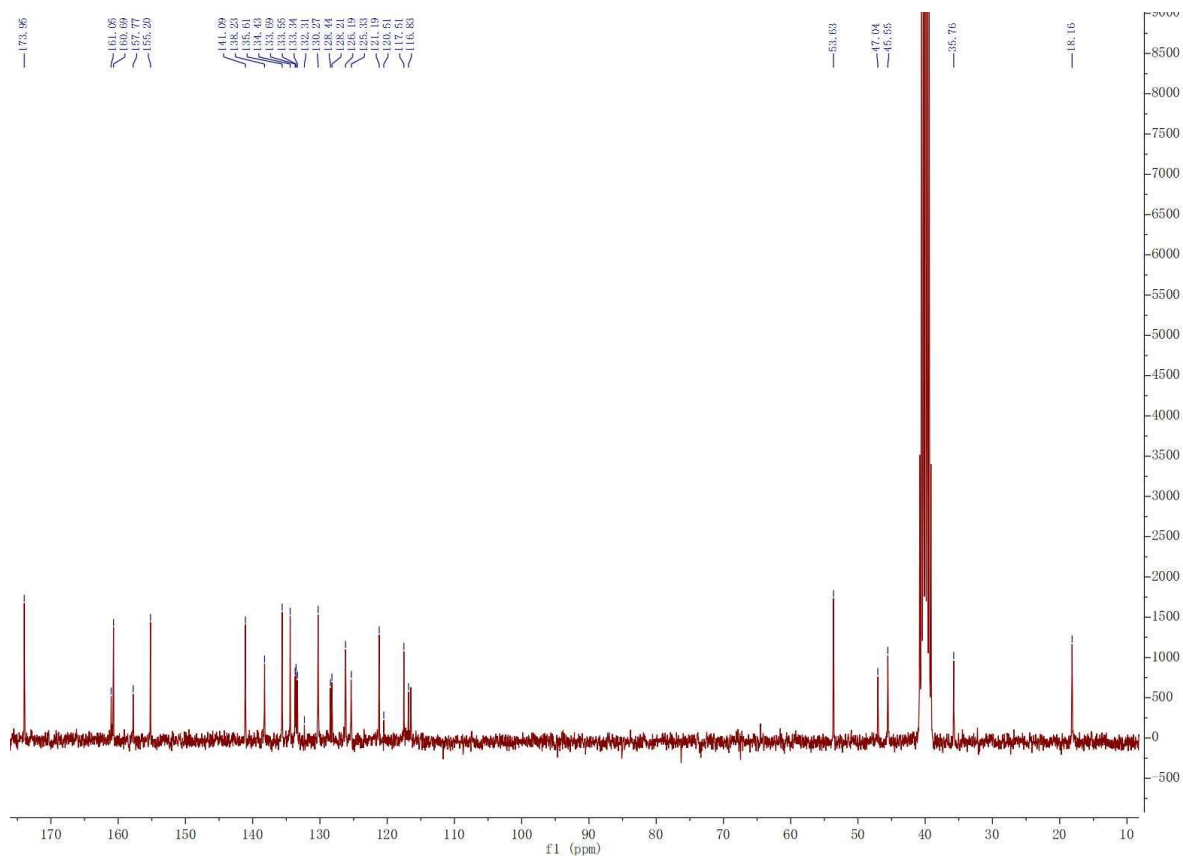

<sup>1</sup>H NMR Spectra for Compound A18

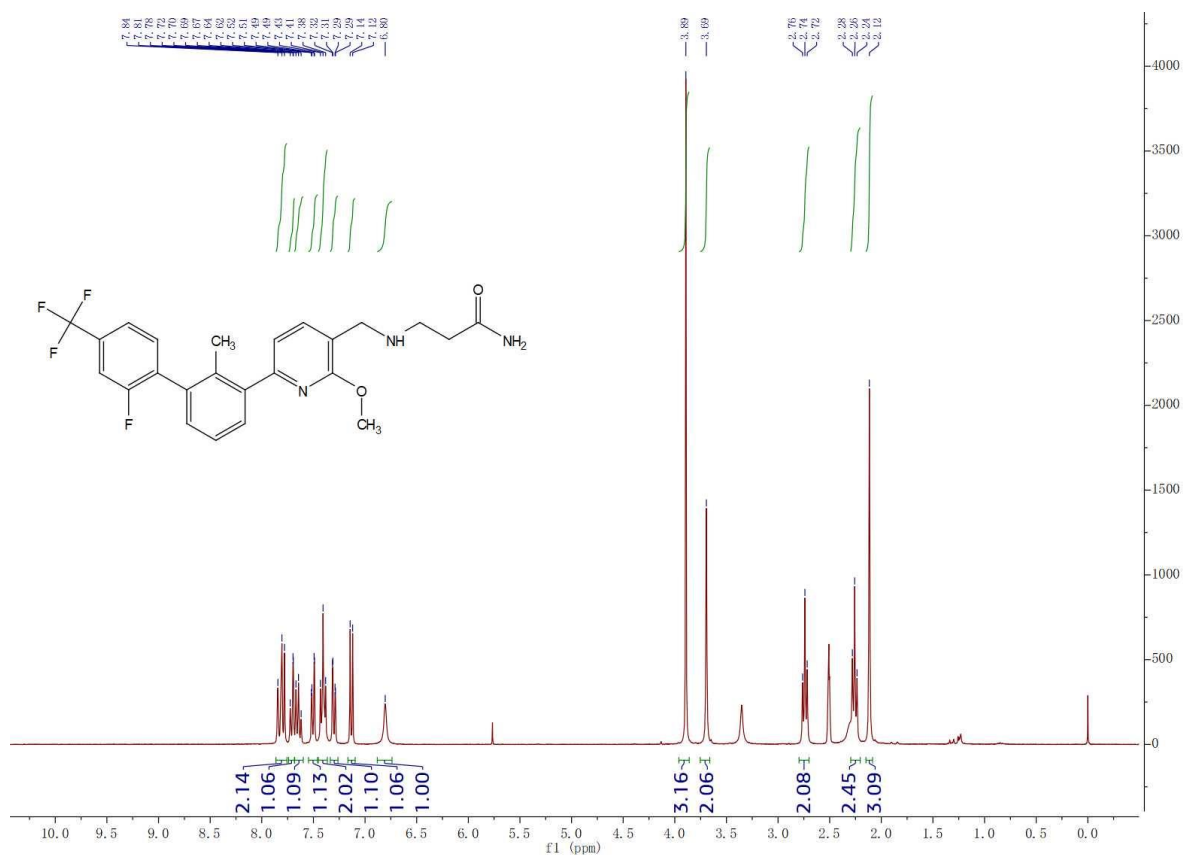

LCMS Spectra for Compound A18

| Sample Name   | Position    | p2f1        | Instrument Name | Instrument 1 | User Name              | G6520B-PC\Admin        |
|---------------|-------------|-------------|-----------------|--------------|------------------------|------------------------|
| Inj Vol       | 0.05        | InjPosition | SampleType      | Sample       | IRM Calibration Status | Success                |
| Data Filename | PL-5-32-p.d | ACQ Method  | Comment         |              | Acquired Time          | 12/25/2020 11:16:54 AM |

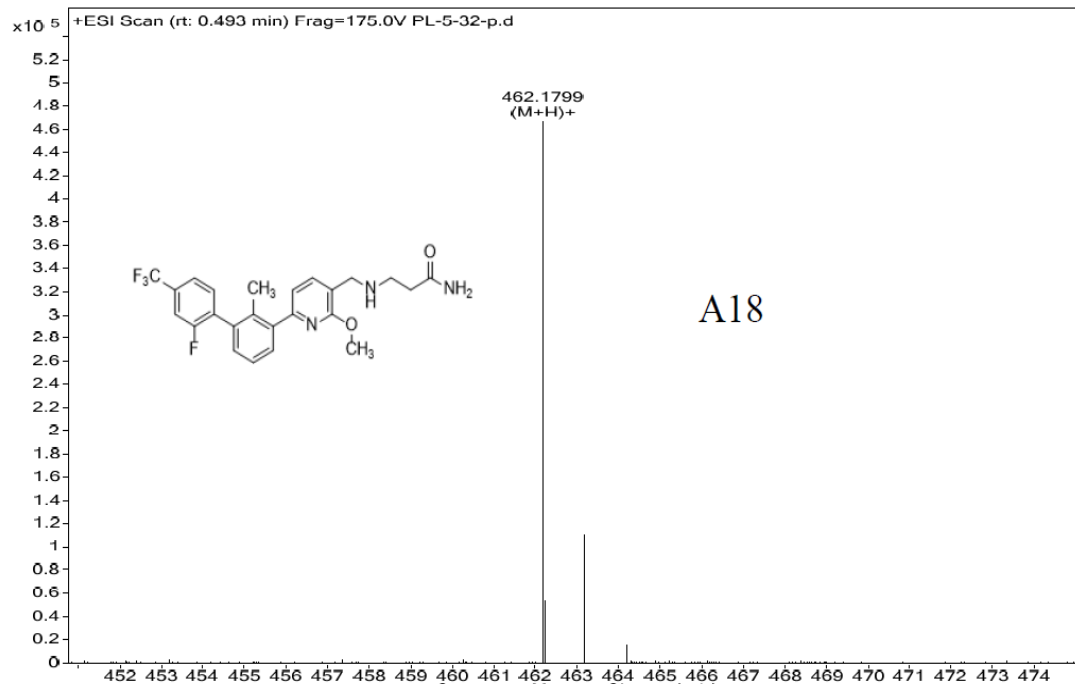

### <sup>13</sup>C NMR Spectra for Compound A18

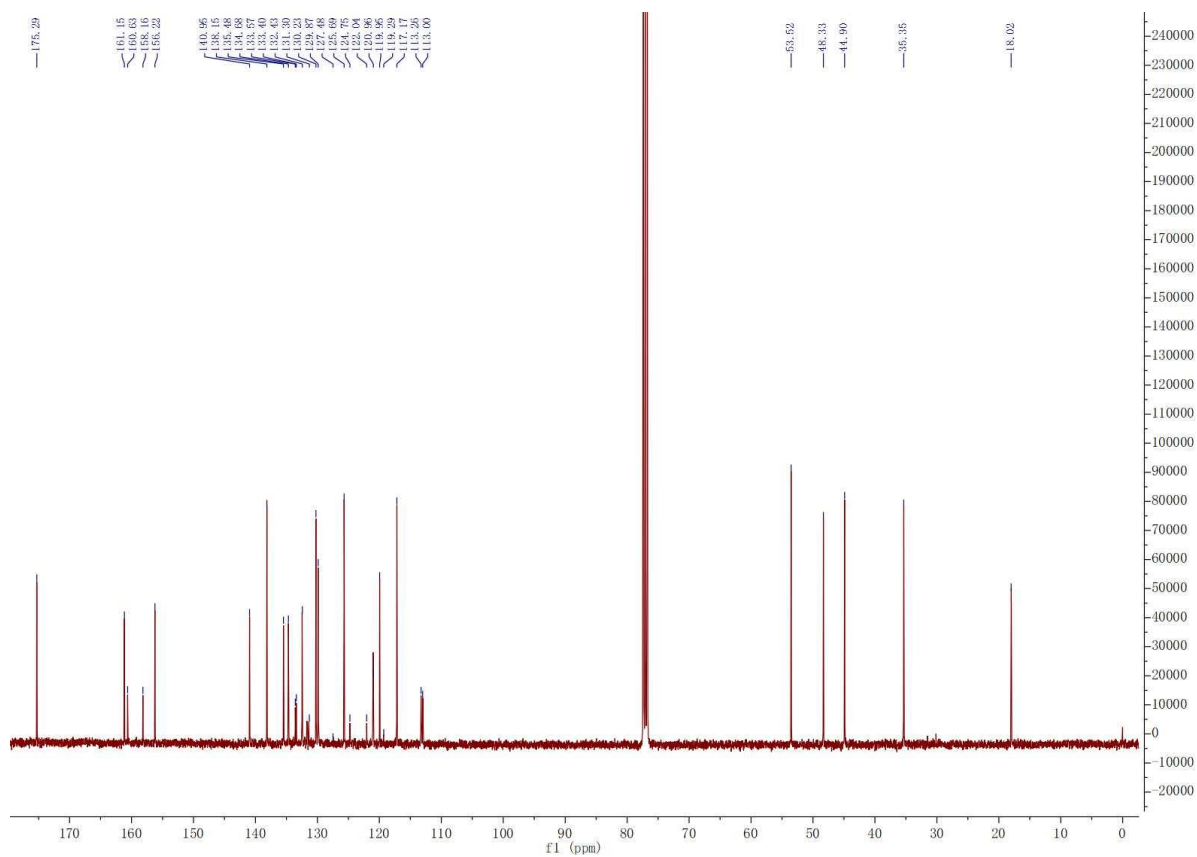

### III. HPLC Spectroscopic data for A9

## SHIMADZU LabSolutions 分析报告

#### <样品信息>

样品名 : A9  
 样品ID : A9  
 数据文件名 : A9.lcd  
 方法文件名 : 通用方法.lcm  
 批处理文件名 : 123156.lcb  
 样品瓶号 : 1-16  
 进样体积 : 10  $\mu$ L  
 分析日期 : 2021/1/14 15:34:51  
 处理日期 : 2021/1/14 16:01:59

样品类型 : 未知  
 分析者 : System Administrator  
 处理者 : System Administrator

#### <色谱图>

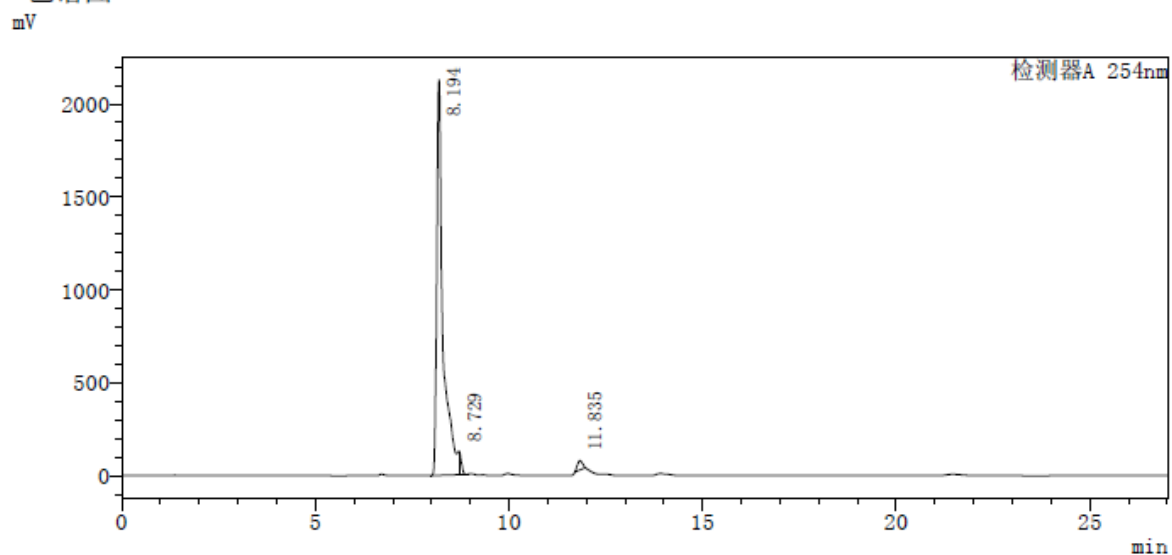

#### <峰表>

检测器A 254nm

| 峰号 | 保留时间   | 面积       | 高度      | 浓度     | 浓度单位 | 标记  | 化合物名 |
|----|--------|----------|---------|--------|------|-----|------|
| 1  | 8.194  | 24072269 | 2131681 | 96.638 |      | M   |      |
| 2  | 8.729  | 382207   | 121915  | 1.534  |      | V M |      |
| 3  | 11.835 | 455384   | 49034   | 1.828  |      | M   |      |
| 总计 |        | 24909860 | 2302630 |        |      |     |      |
